# Supplementary material
Source: MDPI journal article supplement (https://www.mdpi.com/2073-4395/12/12/3124)
Supplement: s1 [file s1]

*Electronic Supplementary Information*

**Table S1.** Effect of soil acidity (Mean  $\pm$  sd) on biometric characteristics (height, diameter, number of leaves, leaf and root area, shoot and root biomass) and physiological characteristics (stomatal conductivity and chlorophyll concentration) for each clone assessed

| Treatm<br>ent | clone       | Height<br>cm     | Diameter<br>cm   | Numb<br>er of<br>branch<br>es | Number of<br>leaves | Stem<br>diameter cm | Root<br>length    | Leaf Area<br>cm <sup>2</sup> | Root Area<br>cm <sup>2</sup> | Shoot<br>weight<br>g | Root<br>weight<br>g | Total<br>weight<br>g | Shoot/R<br>oot    | g <sup>s</sup><br>mmol m <sup>-2</sup> s <sup>-1</sup> | Chlorophyll<br>SPAD |
|---------------|-------------|------------------|------------------|-------------------------------|---------------------|---------------------|-------------------|------------------------------|------------------------------|----------------------|---------------------|----------------------|-------------------|--------------------------------------------------------|---------------------|
| Lime          | AYP-15      | 49.83 $\pm$ 3.3  | 13.45 $\pm$ 2.31 | 7.33 $\pm$ 0.58               | 43.67 $\pm$ 10.69   | 44.33 $\pm$ 0.76    | 70.03 $\pm$ 16.27 | 860.25 $\pm$ 57.86           | 208.15 $\pm$ 28.03           | 37.19 $\pm$ 1.24     | 10.73 $\pm$ 4.23    | 47.92 $\pm$ 4.04     | 26.97 $\pm$ 4.55  | 120.3 $\pm$ 48.55                                      | 10.71 $\pm$ 0.74    |
| Lime          | AYP-20      | 38.5 $\pm$ 3.28  | 16.76 $\pm$ 1.52 | 5 $\pm$ 1                     | 28.33 $\pm$ 9.5     | 41.17 $\pm$ 1.26    | 56.77 $\pm$ 10.43 | 701.45 $\pm$ 27.38           | 151.63 $\pm$ 33.18           | 21.96 $\pm$ 0.63     | 5.48 $\pm$ 0.52     | 27.44 $\pm$ 1.15     | 25.57 $\pm$ 5.58  | 171.4 $\pm$ 33.51                                      | 16.88 $\pm$ 4.32    |
| Lime          | AYP-22      | 59.9 $\pm$ 9.56  | 10.97 $\pm$ 1.34 | 7.33 $\pm$ 4.16               | 34 $\pm$ 3.61       | 38.17 $\pm$ 2.02    | 75.13 $\pm$ 3.12  | 1111.47 $\pm$ 24.15          | 325.33 $\pm$ 51.05           | 29.65 $\pm$ 3.53     | 10.53 $\pm$ 0.87    | 40.18 $\pm$ 3.49     | 22.43 $\pm$ 2.44  | 214.17 $\pm$ 93.5                                      | 14.54 $\pm$ 2.83    |
| Lime          | BN-34       | 50.43 $\pm$ 4.27 | 11.77 $\pm$ 1.97 | 11.67 $\pm$ 4.04              | 62.67 $\pm$ 5.86    | 43.37 $\pm$ 2.32    | 79.6 $\pm$ 5.62   | 1058.05 $\pm$ 20.181         | 340.96 $\pm$ 34.29           | 28.7 $\pm$ 1.54      | 16.48 $\pm$ 2.04    | 45.18 $\pm$ 3.19     | 30.2 $\pm$ 2.14   | 267.1 $\pm$ 19.59                                      | 13.47 $\pm$ 1.5     |
| Lime          | BS-01       | 49.43 $\pm$ 7.77 | 11.61 $\pm$ 0.22 | 6 $\pm$ 1.73                  | 34.33 $\pm$ 15.04   | 40.83 $\pm$ 1.26    | 84.7 $\pm$ 8.93   | 1017.53 $\pm$ 75.96          | 433.57 $\pm$ 72.9            | 27.51 $\pm$ 7.21     | 12.93 $\pm$ 2.56    | 40.44 $\pm$ 9.76     | 46.03 $\pm$ 4.92  | 253.43 $\pm$ 155.77                                    | 10.24 $\pm$ 2.27    |
| Lime          | CA-14       | 53.77 $\pm$ 2.86 | 11.31 $\pm$ 0.45 | 10 $\pm$ 1                    | 49.67 $\pm$ 7.57    | 40.33 $\pm$ 2.08    | 80.27 $\pm$ 6.1   | 834.93 $\pm$ 232.93          | 361.36 $\pm$ 87.1            | 32.08 $\pm$ 3.88     | 11.54 $\pm$ 2.07    | 43.62 $\pm$ 5.88     | 27.32 $\pm$ 13.33 | 103.17 $\pm$ 23.44                                     | 12.73 $\pm$ 2.5     |
| Lime          | CCN-10      | 39.87 $\pm$ 9.25 | 13.66 $\pm$ 0.86 | 13 $\pm$ 3.61                 | 47 $\pm$ 3.61       | 38.33 $\pm$ 3.06    | 79.83 $\pm$ 17.86 | 1184.12 $\pm$ 356.98         | 533.58 $\pm$ 158.6           | 34.11 $\pm$ 3.67     | 16 $\pm$ 1.14       | 50.11 $\pm$ 3.3      | 84.16 $\pm$ 38.21 | 297.53 $\pm$ 74.21                                     | 9.97 $\pm$ 1.35     |
| Lime          | CCN-51      | 50.8 $\pm$ 8.09  | 12.55 $\pm$ 0.55 | 6.67 $\pm$ 0.58               | 41.67 $\pm$ 11.5    | 42.33 $\pm$ 2.52    | 96.93 $\pm$ 20.43 | 1471.46 $\pm$ 259.24         | 494.13 $\pm$ 43.74           | 33.66 $\pm$ 3.89     | 18.57 $\pm$ 1.16    | 52.23 $\pm$ 2.73     | 49.57 $\pm$ 11.32 | 253.03 $\pm$ 134.23                                    | 10.24 $\pm$ 1.25    |
| Lime          | CEPEC-2002  | 41.97 $\pm$ 1.25 | 11.91 $\pm$ 0.99 | 7 $\pm$ 4.36                  | 31.33 $\pm$ 18.61   | 35 $\pm$ 3.04       | 85.2 $\pm$ 7.38   | 828.07 $\pm$ 234.09          | 297.57 $\pm$ 21.75           | 27.84 $\pm$ 5.93     | 12.57 $\pm$ 2.38    | 40.42 $\pm$ 6.72     | 58.73 $\pm$ 7.16  | 390.47 $\pm$ 52.71                                     | 14.9 $\pm$ 1.23     |
| Lime          | CP-2005-C10 | 50.8 $\pm$ 6.19  | 13 $\pm$ 0.8     | 6 $\pm$ 2.65                  | 50.67 $\pm$ 23.03   | 42 $\pm$ 2.65       | 81 $\pm$ 14.73    | 916.37 $\pm$ 138.99          | 325.43 $\pm$ 48.54           | 32.04 $\pm$ 2.17     | 13.92 $\pm$ 0.79    | 45.96 $\pm$ 2.97     | 31.19 $\pm$ 7.02  | 345 $\pm$ 76.8                                         | 11.6 $\pm$ 3.11     |

|      |           |            |            |           |             |            |             |                |               |            |            |            |             |               |            |
|------|-----------|------------|------------|-----------|-------------|------------|-------------|----------------|---------------|------------|------------|------------|-------------|---------------|------------|
| Lime | CP-49-C10 | 45.37±5.54 | 12.91±1.44 | 5.33±0.58 | 32.67±9.61  | 38.17±1.76 | 95.8±21.4   | 1522.56±963.28 | 392.24±2.98   | 30.6±1.82  | 15.17±1.64 | 45.78±2.56 | 44.69±2     | 159±9.66      | 13.87±1.8  |
| Lime | CP-53-C10 | 40.07±2.9  | 12.02±2.39 | 5±1       | 35±7.94     | 40.5±2.18  | 63.07±10.2  | 950.53±140.51  | 343.77±2.6    | 29.43±2.31 | 11.29±1.2  | 40.72±3.48 | 35.77±2.57  | 218.6±22.53   | 12.25±0.52 |
| Lime | EET-400   | 43.57±5.08 | 11.52±0.94 | 9.33±3.51 | 36.67±10.07 | 37±1.8     | 87.97±4.18  | 965.54±113.58  | 308.9±20.83   | 29.19±1.49 | 13.63±0.91 | 42.82±1.24 | 51.59±10.45 | 207.77±72.63  | 11.03±0.85 |
| Lime | H-10      | 54.37±6.4  | 12.48±0.72 | 5.33±1.53 | 36.33±5.86  | 42.17±2.75 | 81.43±9.58  | 1246.87±495.15 | 435.61±126.61 | 30.42±8.27 | 14.9±1.07  | 45.32±9.33 | 35.17±7.76  | 305.33±107.13 | 11.6±0.29  |
| Lime | ICS-1     | 49.37±8.12 | 11.21±0.58 | 5.67±1.53 | 37.67±5.69  | 38±2.18    | 92.7±17.29  | 1140.95±51.17  | 407.49±41.95  | 23.62±2.12 | 9.88±1.66  | 33.5±3.4   | 40.73±15.17 | 290.17±188.18 | 15.35±2.21 |
| Lime | ICS-39    | 56.3±5.71  | 10.83±0.26 | 6±2       | 48±15.1     | 39.83±2.36 | 87.37±30.06 | 1054.92±216.31 | 372.95±77.82  | 35.39±3.05 | 10.74±1.13 | 46.13±2.48 | 34.29±10.91 | 238.93±40.03  | 14.59±1.05 |
| Lime | ICS-6     | 41.67±8.12 | 11.93±1.3  | 6±1       | 40.33±4.62  | 43±3.61    | 92.37±8.14  | 914.53±510.44  | 437.86±37.35  | 29.43±3.81 | 17.16±1.09 | 46.59±4.84 | 47.77±3.33  | 241.1±62.47   | 13.88±0.77 |
| Lime | ICS-95    | 53.17±14   | 11.5±0.25  | 5.67±0.58 | 34.67±7.77  | 44.5±4.77  | 91.37±9.8   | 1182.73±99.57  | 345.16±30.28  | 33.17±3.79 | 11.17±2.19 | 44.34±2.95 | 36.52±8.6   | 235.1±61.75   | 13.58±0.32 |
| Lime | ICT-1026  | 58.2±13.84 | 11±0.42    | 10±3.46   | 59±10.44    | 41.67±4.04 | 62.13±4.39  | 1246.95±159    | 376.03±48.42  | 32.53±2.58 | 12.11±0.99 | 44.64±2.98 | 41.11±6.51  | 285.37±103.94 | 12.86±3.05 |
| Lime | ICT-1087  | 48.9±8.54  | 12.21±0.55 | 7±4.36    | 46.67±8.74  | 43±4.58    | 87.23±4.52  | 1102.92±166.88 | 496.99±53.96  | 41.65±2.52 | 12.78±2.3  | 54.43±0.51 | 48.72±6.45  | 240.1±57.41   | 14.47±2.82 |
| Lime | ICT-1092  | 60.4±9.22  | 11.23±1.79 | 6±3.61    | 35.67±10.41 | 35.73±1.08 | 65.83±5.92  | 1202.26±113.49 | 373.28±17.38  | 29.9±0.38  | 10.54±0.72 | 40.44±0.84 | 31.27±3.99  | 431.33±165.13 | 12.04±0.48 |
| Lime | ICT-1112  | 54.1±5.32  | 11.58±0.95 | 7±3.46    | 41.33±11.15 | 36.5±3.04  | 78.67±13.69 | 1625.34±480.98 | 391.44±48.09  | 29.83±0.55 | 14.97±0.23 | 44.8±0.53  | 38.02±4.06  | 157.27±74.69  | 11.02±0.97 |
| Lime | ICT-1189  | 55.73±7.1  | 12.96±1.31 | 7.67±3.51 | 40.33±22.01 | 33.83±6.53 | 69.83±23.38 | 1253.8±230.88  | 341.51±92.43  | 34.43±9.22 | 11.67±4.93 | 46.1±14.15 | 44.44±10.16 | 95.8±16.8     | 16.52±2.56 |

|      |             |            |            |           |             |            |             |                |               |            |            |            |             |               |            |
|------|-------------|------------|------------|-----------|-------------|------------|-------------|----------------|---------------|------------|------------|------------|-------------|---------------|------------|
| Lime | ICT-1251    | 42.17±9.39 | 9.71±0.65  | 7.33±1.15 | 39.33±7.02  | 38.83±3.25 | 76.33±14.63 | 1162.32±187.42 | 416.42±14.62  | 27.27±2.04 | 10.03±0.63 | 37.3±1.64  | 53.47±7.82  | 103.03±19.56  | 12.22±1.29 |
| Lime | ICT-1281    | 42.17±9.39 | 11.42±1.42 | 8.33±1.53 | 38.33±2.31  | 39.5±5.63  | 65.3±7.85   | 1221.94±166.17 | 379.81±89.76  | 28.13±2.44 | 11.31±2.45 | 39.44±0.12 | 52.76±15.06 | 150.03±53.85  | 12.2±1.62  |
| Lime | ICT-1292    | 61.93±3.91 | 12.76±0.84 | 9±4.36    | 53±11.79    | 41.5±4.77  | 72.27±16.6  | 1057.95±259.89 | 371.26±87.9   | 30.3±2.43  | 15.75±1.26 | 46.05±3.27 | 22.34±7.13  | 367.13±112.92 | 9.94±1.09  |
| Lime | ICT-1506    | 51.33±7.65 | 10.68±0.62 | 8.33±2.52 | 48.33±10.41 | 40.83±2.02 | 84±1.73     | 1038.42±327.82 | 460.27±50.59  | 27.77±1.32 | 10.47±0.93 | 38.24±1.24 | 43.1±9.49   | 404.73±78.89  | 9.97±2.59  |
| Lime | ICT-2142    | 52.77±6.76 | 12.89±0.71 | 8.33±0.58 | 44.67±8.14  | 38.83±4.04 | 89.67±24.42 | 1492.55±585.15 | 524.48±99.7   | 29.87±2.17 | 12.69±0.8  | 42.55±2.42 | 55.84±15.09 | 285.37±83.3   | 8.74±0.54  |
| Lime | ICT-2161    | 47.73±9.99 | 11.85±1.57 | 4.33±2.08 | 32.67±6.81  | 41±3.61    | 86±36.43    | 616.93±233.82  | 472.67±59.35  | 29.21±1.07 | 13.7±2.7   | 42.91±2.55 | 52.35±11.41 | 389.73±19.21  | 11.78±3.82 |
| Lime | ICT-2171    | 50.9±15.55 | 12.56±2.59 | 7.67±3.21 | 38±12.49    | 38.67±2.57 | 90.33±13.05 | 999.13±221.56  | 313.66±68.46  | 35.93±1.55 | 15.47±2.18 | 51.4±3.51  | 37.27±9.9   | 226.37±26.76  | 15.49±2.08 |
| Lime | ICT-2172    | 58.83±2.31 | 13.63±0.53 | 5±2.65    | 33±13.11    | 40.67±2.08 | 68.7±15.82  | 1344.43±398.8  | 300.61±46.84  | 36.59±4.69 | 12.82±3.16 | 49.41±7.83 | 32.85±5     | 186.9±14.14   | 13.47±0.95 |
| Lime | ICT-2173    | 65.6±3.32  | 10.78±0.75 | 3.67±1.53 | 26.67±1.15  | 35.33±4.04 | 68.87±12.94 | 1255.67±181.24 | 349.77±8.27   | 39.1±0.57  | 12.48±1.11 | 51.58±1.14 | 31.36±4.59  | 273.57±33.19  | 12.55±0.82 |
| Lime | ICT-2653    | 49.83±5.58 | 12.16±0.43 | 4±1       | 29.67±5.69  | 39±1.5     | 89±7.54     | 1292.52±403.33 | 307.94±102.67 | 33.13±1.76 | 11.37±1.54 | 44.5±1.23  | 41.97±9.5   | 420.6±18.12   | 14.62±0.99 |
| Lime | IMC-67      | 47.57±8.99 | 12.29±0.48 | 10±1.73   | 45.33±16.44 | 37.33±3.51 | 80.27±20.15 | 1281.34±109.26 | 472.07±49.46  | 28.53±2.04 | 13.36±1.75 | 41.89±3.64 | 54.19±3.33  | 505±72.79     | 12.33±2.33 |
| Lime | IPIRANG A-1 | 64.93±5.22 | 13.02±0.1  | 6.33±1.53 | 45.33±6.11  | 45±3.77    | 73.77±9.76  | 1166.97±147.56 | 345.07±40.91  | 37.69±4.1  | 17.8±1.44  | 55.49±2.66 | 30.46±7.54  | 171.6±33.81   | 10.35±0.82 |
| Lime | NUC-156     | 48.9±7.23  | 11.71±1.92 | 4.67±0.58 | 29±5.29     | 40±1       | 68.53±10.55 | 1013.29±113.32 | 255.71±58.2   | 25.63±0.37 | 7.94±1.38  | 33.57±1.74 | 28.11±10.37 | 176.93±49.55  | 11.47±1.78 |

|      |          |            |            |            |             |            |             |                |               |            |            |            |             |               |            |
|------|----------|------------|------------|------------|-------------|------------|-------------|----------------|---------------|------------|------------|------------|-------------|---------------|------------|
| Lime | PAS-100  | 48.03±5.33 | 11.12±0.93 | 7±1        | 47.33±14.57 | 39.1±1.15  | 57.17±8.81  | 959.96±283.58  | 222.01±30.66  | 29.78±4.44 | 5.97±1.93  | 35.75±4.96 | 26.31±3.71  | 135.17±10.53  | 17.62±5.12 |
| Lime | PAS-105  | 47.4±26.07 | 12.01±1.99 | 6.33±0.58  | 48.67±7.23  | 46.33±1.53 | 81.77±13.55 | 937.02±57.9    | 388.76±58.02  | 32.29±7.86 | 10.21±2.26 | 42.5±8.63  | 47.71±26.85 | 144.87±59.78  | 9.55±0.99  |
| Lime | PAS-91   | 64.27±8.63 | 12.87±0.1  | 6±1        | 39.67±11.68 | 43.5±1.32  | 68.43±5.19  | 1228.88±249.21 | 433.64±32.44  | 34.99±3.58 | 12.72±0.53 | 47.7±4.06  | 29.15±2.23  | 322.3±87.06   | 14±1.28    |
| Lime | PAS-93   | 47.03±6.54 | 11.54±0.37 | 5±1        | 28.67±0.58  | 35±2.65    | 66±16.4     | 885.76±298.14  | 303.3±23.63   | 33.55±6.48 | 9.43±3.2   | 42.98±9.15 | 25.46±3.73  | 101.7±10.48   | 13.36±4.01 |
| Lime | PH-09    | 57.37±1.08 | 11.67±0.41 | 3.67±0.58  | 28.33±5.13  | 44.17±2.57 | 99.43±15.31 | 1014.76±310.62 | 309.07±85.26  | 31.09±2.54 | 13.85±3.28 | 44.94±1.57 | 25.56±4.65  | 128.83±23.56  | 10.49±0.54 |
| Lime | PH-144   | 44.3±1.06  | 12.55±1.88 | 10.33±2.52 | 47.67±5.13  | 37.17±8.13 | 75.87±5.97  | 1016.84±314.11 | 343.32±94.39  | 34.5±6.71  | 12.72±0.79 | 47.22±7.32 | 29.43±10    | 152.4±37.46   | 12.29±0.74 |
| Lime | PH-15    | 46.33±4.6  | 11.29±0.31 | 9±0        | 38±1.73     | 44.5±1.32  | 77±8.26     | 1076.91±224.41 | 491±56.45     | 30.85±4.12 | 16.74±0.42 | 47.59±4.53 | 44.94±7.51  | 188.53±114.35 | 11.43±0.71 |
| Lime | PH-16    | 50.75±7.89 | 11.57±0.46 | 9±1        | 59.33±8.96  | 40.33±2.36 | 62.83±3.88  | 980.65±24.51   | 371.42±14.46  | 37.51±4.67 | 13.45±3.45 | 50.96±5.22 | 30.87±5.3   | 224.63±98.5   | 15.83±1.87 |
| Lime | PH-17    | 46.63±4.25 | 11.69±0.36 | 7.67±0.58  | 50.67±13.65 | 44.17±2.93 | 62.83±11.55 | 1022.74±261.84 | 268.54±39.73  | 33.96±4.47 | 10.48±1.35 | 44.44±3.61 | 25.26±4.39  | 240.83±120.34 | 12.69±1.2  |
| Lime | PH-21    | 70.67±9.87 | 11.94±0.6  | 7±2.65     | 49±17.44    | 42.17±4.25 | 60.9±11.31  | 1251.28±180.54 | 235.27±25.39  | 37.1±3.03  | 11.91±0.68 | 49.02±3.6  | 18.34±0.75  | 196.47±51.35  | 11.27±0.64 |
| Lime | PH-990   | 50.5±10.04 | 11.41±0.37 | 6.67±1.53  | 40.67±4.16  | 40.33±1.76 | 76.33±10.15 | 1185.36±398.31 | 332.32±103.72 | 41.05±2.87 | 13.13±1.25 | 54.18±2.87 | 27.33±12.75 | 139.43±34.98  | 11.09±1.03 |
| Lime | POUND-12 | 48.17±7.95 | 11.33±0.42 | 8±0        | 38±1.73     | 43.5±6.54  | 72.83±14.58 | 984.13±449.92  | 452.9±10.91   | 27.3±4.3   | 10.75±2.35 | 38.05±6.62 | 49.92±16.87 | 425.53±78.2   | 12.67±1.07 |
| Lime | SCA-6    | 54.4±3.5   | 10.73±1.16 | 11.67±5.77 | 61±21       | 43.83±0.29 | 69.1±5.67   | 1315±480.72    | 412.5±120.01  | 36.26±4.54 | 10.13±1.28 | 46.38±3.93 | 37.72±14.97 | 179.83±43.54  | 13.31±1.28 |
| Lime | TSH-1188 | 47.6±10.76 | 11.65±2.21 | 8.33±0.58  | 37.33±0.58  | 40.33±3.51 | 87.63±11.57 | 1054.8±106.63  | 430.1±27.81   | 28.37±4.32 | 12.4±2.17  | 40.77±2.99 | 39.25±8.08  | 379.33±47.73  | 10.85±1.43 |

|         |         |             |            |           |             |            |             |                |               |            |            |            |             |               |             |
|---------|---------|-------------|------------|-----------|-------------|------------|-------------|----------------|---------------|------------|------------|------------|-------------|---------------|-------------|
| Lime    | TSH-565 | 53.87±4.41  | 11.73±0.63 | 7±1.73    | 49±5.57     | 41±2.65    | 69.97±16.67 | 1262.33±206.56 | 433.21±39.23  | 33.69±2.85 | 15.03±1.68 | 48.72±4.54 | 49.71±16.91 | 305.1±71.08   | 12.53±0.75  |
| Lime    | UF-613  | 48.6±8.66   | 10.79±0.69 | 7±1.73    | 50±12.49    | 34.83±10   | 71.6±13.53  | 1070.66±24.07  | 442.48±117.62 | 28.37±4.32 | 8.78±3.59  | 37.15±7.91 | 41.85±13.41 | 379.33±47.73  | 12.2±1.31   |
| Lime    | UF-667  | 44.93±10.46 | 11.76±0.26 | 5.67±0.58 | 37.33±4.93  | 39.5±1.32  | 110.1±9.81  | 1527.33±319.46 | 434.7±34.83   | 37±3.53    | 15.79±2.82 | 52.79±4.89 | 64.2±16.94  | 302.83±57.84  | 11.58±1.44  |
| Lime    | UGU-112 | 48.73±2.85  | 11.56±0.44 | 6.33±0.58 | 37.67±5.13  | 40.23±3.53 | 66.1±10.06  | 838.7±153.5    | 337.4±57.85   | 28.29±3.32 | 7.28±0.62  | 35.57±3.69 | 33.05±6.5   | 197.03±57.7   | 21.93±15.55 |
| Lime    | UGU-126 | 48.99±5.73  | 11.97±0.65 | 5.33±1.15 | 47.67±10.69 | 39.5±3.91  | 74.5±10.1   | 1163.52±111.15 | 238.27±87.27  | 37.52±3.6  | 6.56±1.36  | 44.08±4.36 | 34.05±8.74  | 205.67±136.11 | 10.39±1.16  |
| Lime    | UGU-130 | 40.57±8.27  | 11.55±0.4  | 6±1       | 26.33±2.31  | 38.83±3.88 | 67.67±15.01 | 1012.26±374.34 | 225.38±51.08  | 23.36±2.5  | 5.52±1.64  | 28.88±3.34 | 32.01±10.11 | 156.53±49.5   | 11.06±0.33  |
| Lime    | UNG-53  | 51.53±12.81 | 10.95±0.59 | 6.67±2.08 | 50±7        | 38.17±2.47 | 64.13±12.63 | 1040.46±373.78 | 361.67±10.99  | 33.11±5.22 | 11.49±1.8  | 44.6±7.02  | 35.71±14.58 | 262.5±142.46  | 11.67±5.4   |
| Lime    | UNG-73  | 52.53±14.62 | 12.44±1.17 | 7.67±1.53 | 43±2.65     | 40.43±0.6  | 59.07±0.49  | 1235.49±223.01 | 365.62±73.58  | 32.88±1.99 | 14.96±2.29 | 47.84±3.44 | 37.79±15.83 | 285.17±122.74 | 12.62±1.52  |
| Lime    | UNG-76  | 51.1±6.71   | 12.55±0.63 | 7.33±2.31 | 43.67±6.66  | 40.17±1.89 | 62.23±32.94 | 1155.75±101.96 | 228.66±55.07  | 32.95±1.3  | 10.85±4.35 | 43.8±4.47  | 22.92±8.29  | 277±83.76     | 14.04±2.22  |
| Lime    | UNG-77  | 48.67±8.55  | 14.99±1.37 | 6.33±1.15 | 35±3        | 40.17±6.29 | 86.83±7.41  | 1300.43±219.97 | 350.42±37.99  | 34.4±3.31  | 15.94±0.51 | 50.34±3.81 | 36.39±1.39  | 157.83±32.13  | 9.77±2.18   |
| No lime | AYP-15  | 49.03±3.77  | 11.37±0.25 | 7±0       | 35.33±5.51  | 37.83±1.89 | 58.73±3.53  | 706.92±240.12  | 239.83±82.5   | 30.85±2.89 | 9.39±1.66  | 40.25±3.46 | 23.97±6.85  | 300.1±117.69  | 13.44±2.3   |
| No lime | AYP-20  | 36.97±10.25 | 11.5±1.16  | 5±1.73    | 18±5.29     | 27.17±4.01 | 43.63±5.7   | 388.71±29.59   | 108.34±21.53  | 14.83±6.01 | 2.58±0.8   | 17.41±6.75 | 24.51±12.83 | 262.3±66.41   | 9.87±2.25   |
| No lime | AYP-22  | 52.8±10.29  | 10.25±0.6  | 5±1       | 34.67±1.53  | 48.33±3.51 | 73.53±3.92  | 1032.92±163.27 | 306.99±47.37  | 28.06±0.31 | 9.35±0.54  | 37.42±0.79 | 23.44±7.68  | 274.87±16.41  | 9.68±1.26   |

|         |             |             |            |            |             |            |             |                |              |            |            |            |             |               |            |
|---------|-------------|-------------|------------|------------|-------------|------------|-------------|----------------|--------------|------------|------------|------------|-------------|---------------|------------|
| No lime | BN-34       | 50.93±11.6  | 10.37±2.07 | 14.67±4.04 | 57.67±10.97 | 42±7.21    | 63.43±6.01  | 763.1±108.65   | 334.53±45.9  | 30.84±3.26 | 13.68±0.93 | 44.52±3.11 | 27.3±16.27  | 287.47±134.22 | 13.25±1.08 |
| No lime | BS-01       | 57.5±8.91   | 11.38±1.05 | 6.33±1.53  | 39.33±7.37  | 35.83±1.89 | 70.97±12.38 | 1008.09±159.87 | 338.36±25.68 | 31.47±0.33 | 14.34±4.41 | 45.82±4.43 | 24.89±3.11  | 231.9±62.99   | 11.37±1.23 |
| No lime | CA-14       | 38.4±3.86   | 12.35±1.07 | 7±1        | 51.33±4.16  | 36.83±1.26 | 65.6±3.05   | 818.76±261.82  | 272.47±51.93 | 32.96±5.27 | 12.08±1.34 | 45.04±6.6  | 35.42±11.76 | 269.57±47.41  | 14.38±2.73 |
| No lime | CCN-10      | 46.93±14.68 | 14.25±1.4  | 7±1        | 49.67±5.51  | 39.27±1.55 | 68.77±2.87  | 984.61±166.67  | 298.51±36.2  | 36.36±2.75 | 15.42±1.66 | 51.78±1.24 | 19.56±2.66  | 296.13±15.67  | 14.04±0.21 |
| No lime | CCN-51      | 58.33±13.55 | 13.24±0.96 | 11.33±1.53 | 47.33±10.26 | 40.97±3    | 94.33±17.6  | 1256.04±191.02 | 404.42±25.23 | 37.9±1.68  | 13.63±0.64 | 51.53±2.27 | 32.79±14.06 | 179.97±66.84  | 13.16±0.64 |
| No lime | CEPEC-2002  | 51.53±3.22  | 11.7±0.18  | 8±2        | 38.33±1.53  | 37.67±4.16 | 63.73±10.89 | 750.23±249.06  | 302.44±47.5  | 33.57±4.44 | 13.05±2.31 | 46.62±6.75 | 25.86±7.42  | 298.37±69.56  | 9.2±1.55   |
| No lime | CP-2005-C10 | 57.3±4.1    | 11.24±0.11 | 7.33±1.53  | 47±8.19     | 42±9.17    | 72.8±6.61   | 852.53±244.08  | 273.09±9.77  | 27.49±3.38 | 10.18±3.78 | 37.67±6.36 | 26.04±7.55  | 234.53±7.11   | 9.4±1.66   |
| No lime | CP-49-C10   | 44.67±2.34  | 11.85±1.34 | 5±2.65     | 25.33±3.21  | 37.67±2.52 | 80.73±19.55 | 891.42±139.55  | 332.71±74.09 | 32.49±2.09 | 14.75±1.63 | 47.24±3.43 | 31.54±3.2   | 214.53±79.92  | 12.29±1.18 |
| No lime | CP-53-C10   | 45.5±4.88   | 11.31±0.98 | 8±2.65     | 47±4.36     | 39.33±5.13 | 59.53±12.62 | 812.02±367.77  | 290.11±35.21 | 31.68±2.63 | 12.33±0.8  | 44.01±2.04 | 33.54±12.06 | 239.93±24.27  | 10.37±2.35 |
| No lime | EET-400     | 54.27±7.64  | 11.42±0.74 | 5±0        | 45±1.73     | 42.93±3.2  | 82±11.42    | 988.93±148.35  | 240.07±39.15 | 30.65±4.23 | 10.5±0.93  | 41.15±4.97 | 27.76±5.75  | 122.63±59.08  | 12.23±0.99 |
| No lime | H-10        | 48.73±2.41  | 10.86±0.57 | 6±1.73     | 35.67±5.03  | 44.17±4.37 | 72.93±4.61  | 824.75±280.8   | 376.4±12.89  | 26.83±0.42 | 11.15±1.22 | 37.98±1.09 | 29.75±8.43  | 273.5±111.6   | 8.51±1.29  |
| No lime | ICS-1       | 48.4±4.13   | 11.2±1.51  | 6±1        | 45±7.81     | 42.33±4.07 | 84.03±11    | 917.33±207.5   | 272.13±29.3  | 29.5±1.83  | 11.27±2.5  | 40.77±2.45 | 21.5±5.01   | 262±43.91     | 12.75±2.26 |
| No lime | ICS-39      | 54.13±12.11 | 11±0.83    | 5.33±0.58  | 33.67±6.11  | 40.27±2.87 | 73.77±4.1   | 816.56±67.3    | 305.41±67.1  | 30.82±7.19 | 10.99±1.96 | 41.81±9.09 | 29.55±9.11  | 268.7±23.83   | 11.57±3.33 |
| No lime | ICS-6       | 52.07±4.76  | 11.72±0.56 | 3±1        | 28±6.56     | 42.03±3.54 | 89.27±16.06 | 815.24±66.01   | 328.02±83.92 | 28.56±5.87 | 12.03±1.14 | 40.59±6.99 | 33.22±9.6   | 143.27±31.37  | 13.1±1.04  |

|            |          |                 |                |                |             |            |                 |                    |                  |            |                |                |                 |                   |            |
|------------|----------|-----------------|----------------|----------------|-------------|------------|-----------------|--------------------|------------------|------------|----------------|----------------|-----------------|-------------------|------------|
| No<br>lime | ICS-95   | 59.6±3.2<br>2   | 10.68±0.4      | 3.33±1.<br>15  | 29±6.24     | 46.17±4.07 | 82.23±4.<br>47  | 967.35±152<br>.73  | 284.28±16.<br>42 | 37.55±4.87 | 11.09±0.9<br>2 | 48.64±4.7<br>1 | 22.71±4.<br>32  | 222.13±26.<br>42  | 13.91±0.94 |
| No<br>lime | ICT-1026 | 54.37±10<br>.08 | 11.22±1.0<br>9 | 7.33±2.<br>89  | 44±18.19    | 38±3       | 58.53±5.<br>49  | 749.85±164<br>.22  | 261.78±41.<br>87 | 35.6±0.38  | 13.16±2.8<br>6 | 48.76±2.7      | 23.7±0.5<br>7   | 188.87±72.<br>71  | 13.09±1.01 |
| No<br>lime | ICT-1087 | 66.47±3.<br>76  | 12.15±1.5<br>8 | 9.67±2.<br>52  | 46.67±11.37 | 35.5±1.8   | 77.07±13<br>.32 | 904.52±354<br>.28  | 295.09±10.<br>67 | 37.46±3.95 | 12.86±1.9<br>7 | 50.32±5.9<br>1 | 23.68±6.<br>29  | 195.47±67.<br>83  | 12.32±1.04 |
| No<br>lime | ICT-1092 | 47.17±8.<br>86  | 9.89±0.72      | 7±3.61         | 40.67±10.69 | 39±2       | 60.8±3.3        | 1040.1±143<br>.69  | 287.74±20.<br>63 | 26.89±4.34 | 8.45±1.03      | 35.34±5.2<br>1 | 26.1±5.8<br>1   | 218.27±74.<br>93  | 15.22±2.38 |
| No<br>lime | ICT-1112 | 58.17±6.<br>95  | 11.71±0.6<br>2 | 3.67±1.<br>15  | 30±2.65     | 42.33±0.58 | 77.83±16<br>.83 | 985.5±161.<br>98   | 342±49.72        | 29.5±3.16  | 11.5±0.9       | 41±3.39        | 31.68±4.<br>36  | 190.2±41.3<br>8   | 14.93±5.18 |
| No<br>lime | ICT-1189 | 47.43±12<br>.2  | 11.09±0.7<br>6 | 6.33±3.<br>06  | 33±13.75    | 44±4       | 63.77±10<br>.08 | 1207.02±20<br>7.58 | 292.81±65.<br>97 | 33.63±3.97 | 10.55±3.6<br>9 | 44.17±7.5<br>3 | 27.79±9.<br>07  | 200.83±19.<br>16  | 14.34±0.53 |
| No<br>lime | ICT-1251 | 39.47±11<br>.27 | 8.35±1.04      | 5±1.73         | 31.33±8.08  | 44.33±3.79 | 73.37±12<br>.8  | 812.41±156<br>.56  | 346.18±93.<br>04 | 28.55±3.99 | 9.44±0.83      | 37.99±4.8<br>2 | 40.42±5.<br>72  | 254.1±13.2<br>5   | 15.57±2.68 |
| No<br>lime | ICT-1281 | 51.8±11.<br>84  | 12±1.51        | 7±2.65         | 38±3.46     | 49.5±7.37  | 57.63±9.<br>06  | 656.73±111<br>.5   | 360.48±68.<br>77 | 28.23±2.18 | 11.46±2.1<br>6 | 39.69±4.1<br>1 | 38.93±20<br>.04 | 183.63±21.<br>45  | 14.55±1.77 |
| No<br>lime | ICT-1292 | 53.5±1.6        | 11.34±0.9<br>1 | 6±1.73         | 42±10.58    | 39±8       | 67.33±13<br>.34 | 968.91±27.<br>64   | 293.15±8.2<br>8  | 28.55±1.49 | 13.14±2.7<br>9 | 41.69±3.5<br>4 | 24.32±7.<br>33  | 178.03±41.<br>01  | 15.62±1.65 |
| No<br>lime | ICT-1506 | 56.43±8.<br>6   | 10.92±0.3<br>2 | 10.67±0<br>.58 | 45.67±8.39  | 40±1       | 73.7±13.<br>42  | 776.12±203<br>.37  | 304.42±34.<br>17 | 25.24±3.27 | 13.02±1.5<br>4 | 38.26±2.7<br>2 | 34.33±4.<br>29  | 223.17±25.<br>14  | 8.7±1.12   |
| No<br>lime | ICT-2142 | 49.73±1.<br>17  | 11.52±1.0<br>3 | 5±1            | 34.33±5.86  | 41.67±2.89 | 83.3±9.5<br>6   | 714.19±123<br>.8   | 339.7±29.8<br>6  | 33.14±2.47 | 14.49±1.8<br>8 | 47.63±3.0<br>2 | 41.31±4.<br>04  | 222.27±12<br>1.02 | 12.29±3.17 |
| No<br>lime | ICT-2161 | 43.53±1.<br>56  | 11.54±0.7<br>7 | 5.33±2.<br>08  | 36.33±10.02 | 36±1       | 83.37±26<br>.07 | 983.81±111<br>.09  | 257.92±42.<br>13 | 27.09±3.29 | 12.81±1.0<br>7 | 39.9±2.56      | 24.8±15.<br>42  | 193.5±37.8<br>5   | 15.7±1.63  |
| No<br>lime | ICT-2171 | 55.13±8.<br>75  | 12.39±1.5<br>2 | 6.33±0.<br>58  | 43±1.73     | 36.5±3.04  | 76.83±9.<br>75  | 840.24±112<br>.66  | 285.55±69.<br>8  | 29.25±5.14 | 12.27±2.5<br>9 | 41.52±3.9<br>4 | 26.9±6.5<br>6   | 278.43±11<br>4.28 | 18.31±3.56 |

|         |             |             |            |           |             |            |             |                |               |            |            |            |             |               |            |
|---------|-------------|-------------|------------|-----------|-------------|------------|-------------|----------------|---------------|------------|------------|------------|-------------|---------------|------------|
| No lime | ICT-2172    | 58.97±8.54  | 12.41±1.17 | 5.33±1.53 | 36±6.24     | 36.17±2.02 | 68.47±10.23 | 1214.25±396.13 | 249.74±50.7   | 30.7±4.21  | 10.36±0.57 | 41.06±4.38 | 25.43±4.85  | 417.8±451.08  | 13.89±1.36 |
| No lime | ICT-2173    | 55.83±15.59 | 11.72±1.8  | 4±2.65    | 24.67±8.74  | 35±4       | 55.03±5.7   | 785.07±113.06  | 277.44±52.88  | 30.81±2.4  | 9.69±0.7   | 40.5±1.75  | 18.16±2.56  | 242.07±68.36  | 12.59±2.33 |
| No lime | ICT-2653    | 42.5±2.61   | 11.33±0.89 | 4.67±2.08 | 29.67±2.08  | 42.67±2.52 | 78.53±27.2  | 879.42±353.22  | 337.94±76.68  | 26.57±2.6  | 10.16±1.52 | 36.73±2.81 | 27.82±7.1   | 141.93±51.56  | 14.12±1.6  |
| No lime | IMC-67      | 44.8±3.5    | 11.66±0.44 | 6.67±2.08 | 38.33±2.52  | 44±2       | 66.6±4.5    | 1022.91±74.07  | 364.6±107.49  | 27.59±1.54 | 12.4±1.02  | 40±2.52    | 32.72±3.15  | 318.1±133.36  | 9.52±1.49  |
| No lime | IPIRANG A-1 | 68.9±13.09  | 11.12±1.84 | 4.33±1.53 | 33.33±6.03  | 41±1       | 59.57±7.57  | 1117.13±319.42 | 340.01±75.46  | 30.1±5.09  | 12.32±1.48 | 42.42±5.57 | 20.6±3.99   | 257.97±74.69  | 11.76±0.33 |
| No lime | NUC-156     | 34.43±3.81  | 10.04±0.98 | 6±1       | 31.67±6.51  | 36.83±5.92 | 63.27±16.78 | 852.31±102.62  | 279.31±119.03 | 22.99±3.13 | 5.99±2.89  | 28.97±6.02 | 35.08±13.96 | 354.17±132.09 | 9.05±1.93  |
| No lime | PAS-100     | 38.97±2.44  | 12.68±0.58 | 8±1       | 41.67±4.51  | 36.33±5.03 | 53.27±5.11  | 845.88±203.03  | 190.21±41.08  | 25.53±4.05 | 5.94±1.69  | 31.47±5.63 | 29.84±11.25 | 144.73±35.03  | 11.09±0.47 |
| No lime | PAS-105     | 41.1±1.01   | 10.96±0.89 | 4.33±1.53 | 31.67±4.04  | 45.77±3.67 | 65.57±6.31  | 596.09±151.4   | 300.61±49.22  | 25.93±1.19 | 11.35±1.88 | 37.28±1.8  | 27.35±6.88  | 79.57±18.6    | 13.89±1.82 |
| No lime | PAS-91      | 62.27±17.7  | 12.86±1.44 | 3±1.73    | 29±7        | 48.67±1.53 | 55.27±5.85  | 1173.48±144.08 | 290.09±49.64  | 34.87±2.58 | 12.9±0.36  | 47.76±2.53 | 24.26±10.45 | 163.33±67.37  | 13.54±2.74 |
| No lime | PAS-93      | 47.8±6.68   | 11.81±1.33 | 5±2       | 37.67±8.5   | 36.5±5.27  | 59.93±15.43 | 867.42±175.33  | 197.86±32.77  | 32.15±3.12 | 10.41±0.43 | 42.56±3.25 | 25.84±4.14  | 212.57±13.12  | 11.42±0.61 |
| No lime | PH-09       | 59.97±8.9   | 11.46±0.8  | 4±1       | 27.67±2.52  | 37.33±1.53 | 76.83±10.28 | 855.92±263.79  | 307.15±29.94  | 33.05±3.6  | 12.63±1.13 | 45.68±4.38 | 24.19±6.6   | 190.3±51.72   | 10.68±0.74 |
| No lime | PH-144      | 51.27±13.44 | 11.29±0.87 | 8.33±1.53 | 31±4.58     | 37.67±3.21 | 65.27±8.05  | 977.8±345.81   | 252.06±47.67  | 35.55±2.7  | 13.86±1.18 | 49.41±2.54 | 21.87±6.51  | 213.2±25.78   | 11.54±3.06 |
| No lime | PH-15       | 49.7±6.61   | 10.57±0.92 | 5.33±1.15 | 42.67±12.42 | 43.67±8.08 | 76.4±14.24  | 886.47±73.05   | 436.03±86.07  | 30.51±2.7  | 14.07±0.18 | 44.59±2.66 | 34.53±3.36  | 242±82.94     | 12.77±2.26 |



|         |          |            |            |            |             |            |             |                |              |            |            |            |             |              |            |
|---------|----------|------------|------------|------------|-------------|------------|-------------|----------------|--------------|------------|------------|------------|-------------|--------------|------------|
| No lime | PH-16    | 47.23±3.03 | 11.01±0.52 | 9.33±3.51  | 45±3.61     | 43±7.21    | 59.47±12.45 | 817.56±64.43   | 368.82±92.05 | 30.61±5.28 | 13.32±2.34 | 43.93±6.09 | 21.44±4.09  | 288.87±86.38 | 11.31±0.95 |
| No lime | PH-17    | 40.27±0.81 | 11.05±0.26 | 11±1.73    | 52±6.56     | 33.33±1.53 | 56.97±6.85  | 629.7±262.86   | 251.8±72.76  | 27.49±3.38 | 10.18±3.78 | 37.67±6.36 | 29.5±6.76   | 297±94.92    | 10.39±1.95 |
| No lime | PH-21    | 59.3±12.95 | 11.03±1.04 | 8.33±2.52  | 57.67±8.02  | 43.67±4.04 | 49.33±2.2   | 1043.26±101.37 | 302.73±22.73 | 36.2±0.9   | 11.49±0.17 | 47.69±0.95 | 21.1±7.44   | 157.57±51.37 | 10.2±1.32  |
| No lime | PH-990   | 50.87±5.78 | 10.96±1.29 | 8±4.36     | 38±6.08     | 40.33±8.39 | 64.93±9.51  | 943.25±131.86  | 318.69±43.38 | 32.96±1.33 | 10.98±0.92 | 43.94±0.67 | 22.12±10.78 | 146.63±43.41 | 11.72±1.21 |
| No lime | POUND-12 | 54.23±5.68 | 10.28±0.78 | 8±1        | 39.33±5.51  | 40.33±2.89 | 65.7±6.95   | 939.7±250.98   | 233.15±6.54  | 23.78±5.52 | 10.43±1.98 | 34.21±7.28 | 20.66±1.03  | 223.07±53.68 | 10.18±1.9  |
| No lime | SCA-6    | 55.2±4.07  | 11.12±0.48 | 11.33±3.51 | 63±14.11    | 47.33±2.52 | 68.33±8.78  | 943.69±104.98  | 269.91±33.02 | 32.07±4.86 | 12.1±0.71  | 44.17±5.51 | 22.35±6.01  | 185.4±21.97  | 12.03±1.44 |
| No lime | TSH-1188 | 43.8±2.33  | 12.63±0.67 | 6±3        | 35.33±11.15 | 39.33±4.51 | 72.73±7.35  | 737.38±245.39  | 345.92±62.91 | 27.96±3.01 | 13.21±1.19 | 41.17±3.98 | 34.42±7.49  | 311.5±8.09   | 14.75±3.65 |
| No lime | TSH-565  | 50±6.9     | 12.19±1.65 | 5±1        | 47.67±7.37  | 39.67±2.02 | 65.1±9.91   | 902.88±140.78  | 289.53±48.57 | 34.02±2.86 | 14.77±1.09 | 48.78±3.83 | 24.07±6.75  | 317±43.39    | 14.31±1.78 |
| No lime | UF-613   | 44.83±3.89 | 11.49±1    | 6.33±1.15  | 29.33±6.43  | 38.33±3.06 | 60.83±27.95 | 815.09±219.47  | 303.36±123.5 | 31.14±1.01 | 9.56±2.52  | 40.69±2.02 | 27.9±3.92   | 283.1±33.16  | 14.14±3.89 |
| No lime | UF-667   | 51.47±9.71 | 11.08±0.53 | 5.33±2.08  | 47±13.08    | 45.07±4.31 | 109.6±7.02  | 1319.35±87.38  | 395.79±74.33 | 37.51±1.46 | 9.99±1.66  | 47.51±0.47 | 36.84±5.25  | 327.1±77.07  | 14.53±1.47 |
| No lime | UGU-112  | 50.83±4.92 | 10.59±0.36 | 8.67±3.21  | 46.67±15.5  | 36±2.65    | 53.6±5.5    | 531.56±143.4   | 239.69±43.73 | 27.18±3.16 | 8.22±2.15  | 35.4±5.3   | 27.73±1.42  | 274.87±12.76 | 9.54±1.1   |
| No lime | UGU-126  | 39.57±3.6  | 12.54±1.45 | 5±2.65     | 27.33±6.66  | 37.17±2.47 | 51.43±14.42 | 718.3±121.84   | 210.6±41.72  | 20.07±5.61 | 6.01±2.22  | 26.08±7.82 | 29.33±10.53 | 166.07±30.52 | 10.58±0.77 |
| No lime | UGU-130  | 35.37±1.21 | 10.06±1.07 | 4±0        | 18.67±3.06  | 32±6       | 60.6±14.91  | 613.58±99.04   | 214.62±96.59 | 15.47±6.47 | 5.93±3.19  | 21.39±9.02 | 32.04±11.33 | 162.83±96.45 | 8.45±1.73  |

|            |        |                 |                |               |            |            |                 |                    |                  |            |                |                |                 |                   |            |
|------------|--------|-----------------|----------------|---------------|------------|------------|-----------------|--------------------|------------------|------------|----------------|----------------|-----------------|-------------------|------------|
| No<br>lime | UNG-53 | 56.17±10<br>.96 | 10.04±0.2<br>9 | 6.33±1.<br>53 | 36.33±4.93 | 45.27±3.16 | 63.71±7.<br>32  | 990.34±129<br>.27  | 251.17±17.<br>05 | 28.46±2.43 | 9.29±1.07      | 37.75±2.2      | 22.96±4.<br>72  | 325.17±11<br>9.44 | 10.46±0.82 |
| No<br>lime | UNG-73 | 47.3±2.4<br>6   | 11.43±0.6<br>1 | 7.67±0.<br>58 | 38.33±3.06 | 41.5±3.28  | 46.9±7.5<br>8   | 658.56±94.<br>99   | 324.58±75.<br>52 | 21.72±4.04 | 11.44±1.2<br>5 | 33.16±4.2<br>5 | 28.19±8.<br>97  | 243.27±80.<br>91  | 14.79±2.39 |
| No<br>lime | UNG-76 | 32.27±1.<br>17  | 12.59±0.9<br>9 | 4.67±1.<br>53 | 22.33±7.64 | 30.17±5.75 | 47.27±24<br>.47 | 483.67±143<br>.19  | 174.68±13.<br>15 | 11.5±5.44  | 1.82±0.91      | 13.32±6.3<br>4 | 31.27±11<br>.94 | 162.47±17.<br>57  | 11.02±3.69 |
| No<br>lime | UNG-77 | 45.83±6.<br>82  | 12.12±1.1<br>7 | 7±2           | 30±2       | 38.67±6.81 | 74.4±6.1<br>2   | 1108.74±41<br>2.89 | 314.03±51.<br>52 | 28.73±4.43 | 11.34±1.9<br>2 | 40.07±6.3<br>1 | 29.04±5.<br>83  | 189±81.34         | 13.77±2.67 |

**Table S2.** Effect of soil acidity (Mean  $\pm$  sd) on the concentration and uptake of macronutrients (N, P, K, Ca, Mg) and micronutrients (Cu, Fe, Mn and Zn) for each cacao genotype assessed

| Treat<br>ment | Genotyp<br>e | N             | P             | K             | Ca            | Mg            | Cu                  | Fe               | Mn               | Zn              | N<br>uptake            | P<br>uptake     | K<br>uptake       | Ca<br>uptake     | Mg<br>uptake      | Cu<br>uptake  | Fe<br>uptake    | Mn<br>uptake    | Zn<br>uptake   |
|---------------|--------------|---------------|---------------|---------------|---------------|---------------|---------------------|------------------|------------------|-----------------|------------------------|-----------------|-------------------|------------------|-------------------|---------------|-----------------|-----------------|----------------|
| Units         |              | %             |               |               |               |               | mg kg <sup>-1</sup> |                  |                  |                 | mg plant <sup>-1</sup> |                 |                   |                  |                   |               |                 |                 |                |
| Lime          | AYP-15       | 1.09±<br>0.12 | 0.15±<br>0.15 | 1.97±<br>0.16 | 1.89±<br>0.08 | 0.89±<br>0.01 | 1.4±0.0<br>5        | 96.96±11<br>.92  | 114.08±40<br>.1  | 30.78±2<br>.69  | 406.67±4<br>6.67       | 54.13±5<br>5.19 | 605.58±40<br>.42  | 703.98±3<br>3.45 | 332.23±1<br>2.94  | 0.52±0.<br>01 | 36.15±5<br>.66  | 42.32±14.<br>25 | 11.47±1<br>.4  |
| Lime          | AYP-20       | 1.16±<br>0.07 | 0.06±<br>0.02 | 2.41±<br>0.12 | 2.17±<br>0.17 | 1.02±<br>0.03 | 11.96±<br>3.09      | 111.86±3<br>6.31 | 206.78±82<br>.93 | 71.54±1<br>5.42 | 254.32±2<br>1.51       | 13.85±2<br>.93  | 354.54±12<br>9.89 | 476.85±2<br>8.17 | 223.3±9.7<br>5    | 2.61±0.<br>61 | 24.53±7<br>.81  | 45.48±18.<br>71 | 15.76±3<br>.75 |
| Lime          | AYP-22       | 0.68±<br>0.03 | 0.03±<br>0.02 | 2.32±<br>0.13 | 1.18±<br>0.77 | 0.63±<br>0.35 | 6.9±1.2<br>6        | 101.53±1<br>2.41 | 211.54±82<br>.23 | 72.74±2<br>0.5  | 201.01±1<br>5.95       | 8.5±5.2<br>8    | 650.96±34<br>.23  | 366.5±28<br>3.01 | 193.98±1<br>33.08 | 2.03±0.<br>33 | 30.35±7<br>.17  | 63.08±25.<br>67 | 21.23±4<br>.57 |
| Lime          | BN-34        | 1.21±<br>0.02 | 0.04±<br>0.01 | 1.87±<br>0.07 | 0.41±<br>0.11 | 0.27±<br>0.02 | 6.36±0.<br>24       | 152.53±3<br>3.72 | 166.35±8.<br>49  | 47.44±1<br>.34  | 346.41±2<br>2.55       | 11.4±2.<br>49   | 575.35±41<br>.68  | 117.47±2<br>6.6  | 76.41±5.0<br>2    | 1.82±0.<br>06 | 43.77±9<br>.72  | 47.77±4.2<br>1  | 13.61±0<br>.79 |
| Lime          | BS-01        | 1.19±<br>0.07 | 0.06±<br>0.01 | 2.24±<br>0.15 | 1.54±<br>0.2  | 0.9±0.<br>05  | 5.73±2.<br>81       | 102.52±1<br>4.77 | 97.2±43.9<br>5   | 42.79±5<br>.14  | 329.58±1<br>01.26      | 17.49±5<br>.01  | 706.06±47<br>.76  | 414.26±6<br>3.26 | 249.26±7<br>3.01  | 1.44±0.<br>38 | 28.91±1<br>1.06 | 28.54±16.<br>61 | 11.58±2<br>.34 |
| Lime          | CA-14        | 1.13±<br>0.04 | 0.08±<br>0.03 | 1.81±<br>0.2  | 1±0.0<br>7    | 0.68±<br>0.06 | 5.76±1.<br>75       | 110.45±3<br>3.62 | 67.06±17.<br>93  | 32.98±4<br>.86  | 362.65±3<br>1.24       | 26.85±1<br>0.26 | 594.44±89<br>.7   | 318.08±1<br>8.29 | 215.85±1<br>2.73  | 1.81±0.<br>4  | 34.6±7.<br>28   | 21.42±5.3<br>8  | 10.48±0<br>.79 |
| Lime          | CCN-10       | 1.11±<br>0.03 | 0.08±<br>0.01 | 2.02±<br>0.11 | 1.49±<br>0.28 | 0.7±0.<br>09  | 4.06±1.<br>53       | 143.72±9<br>3.58 | 65.68±30.<br>51  | 33.18±2<br>.49  | 377.53±4<br>3.58       | 25.95±2<br>.53  | 731.4±17.<br>91   | 503.21±7<br>1.64 | 237.07±1<br>6.72  | 1.36±0.<br>41 | 47.23±2<br>6.77 | 21.82±9.1<br>5  | 11.27±0<br>.8  |
| Lime          | CCN-51       | 1.18±<br>0.03 | 0.08±<br>0.03 | 2.55±<br>0.18 | 1.6±0.<br>13  | 0.8±0.<br>04  | 2.48±0.<br>95       | 142.98±4<br>2.42 | 86.43±17.<br>17  | 29.9±4.<br>9    | 395.32±3<br>6.8        | 26.69±8<br>.94  | 968.71±98<br>.78  | 540.16±8<br>1.54 | 269.94±4<br>1.09  | 0.83±0.<br>36 | 48.04±1<br>5.85 | 29.49±8.6<br>2  | 10.01±1<br>.64 |

|      |             |           |           |           |           |           |           |              |               |            |               |             |               |               |               |           |             |             |            |
|------|-------------|-----------|-----------|-----------|-----------|-----------|-----------|--------------|---------------|------------|---------------|-------------|---------------|---------------|---------------|-----------|-------------|-------------|------------|
| Lime | CEPEC-2002  | 1.16±0.06 | 0.04±0.01 | 1.88±0.3  | 1.62±0.07 | 0.84±0.1  | 4.71±1.22 | 102.43±16.69 | 141.54±35.07  | 45.42±9.04 | 319.81±54.46  | 12.21±3.86  | 621.55±24.01  | 447.22±77.53  | 234.23±53.36  | 1.36±0.59 | 28.41±7.19  | 38.95±11.47 | 12.97±4.99 |
| Lime | CP-2005-C10 | 1.19±0.13 | 0.04±0.01 | 1.66±0.04 | 0.54±0.11 | 0.3±0.04  | 2.54±1.22 | 92.27±27.21  | 175.09±24.63  | 39.79±3.18 | 379.47±14.31  | 13.77±3.22  | 454.77±47.62  | 171.61±35.7   | 95.87±10.49   | 0.83±0.42 | 29.19±6.47  | 56.1±9.04   | 12.71±0.4  |
| Lime | CP-49-C10   | 1.18±0.05 | 0.06±0.01 | 1.66±0.12 | 1.75±0.14 | 1.02±0.03 | 5.61±3.37 | 69.95±11.8   | 82.92±12.12   | 33.76±4.64 | 362.73±36.62  | 17.4±2.61   | 539.47±52.33  | 533.69±38.89  | 312.48±27.44  | 1.68±0.92 | 21.28±2.65  | 25.44±4.4   | 10.27±0.83 |
| Lime | CP-53-C10   | 1.24±0.04 | 0.07±0.01 | 2.65±0.19 | 1.42±0.11 | 0.67±0.06 | 4.15±4.86 | 94.06±9.24   | 86.48±88.82   | 27.76±4.77 | 363.88±29.59  | 20.66±4.06  | 838.93±67.51  | 419.86±56.96  | 197.57±13.96  | 1.28±1.56 | 27.72±4.08  | 25.57±26.38 | 8.2±1.71   |
| Lime | EET-400     | 1.11±0.09 | 0.04±0.01 | 2.31±0.18 | 0.64±0.27 | 0.36±0.09 | 8.52±0.19 | 141.05±72.54 | 110.13±20.25  | 44.84±3.2  | 323.93±43.48  | 11.77±3.52  | 707.14±100.67 | 188.45±90.65  | 106.96±33.15  | 2.49±0.09 | 41.81±22.96 | 32.17±6.27  | 13.1±1.31  |
| Lime | H-10        | 0.91±0.12 | 0.06±0.01 | 2.36±0.28 | 2.24±0.42 | 1.61±0.2  | 4.08±0.86 | 101.96±8.17  | 106.05±69.86  | 30.4±4.68  | 282.01±114.82 | 18.66±7.96  | 632.71±79.3   | 691.71±280.32 | 496.44±180.08 | 1.24±0.43 | 31.42±10.89 | 36.1±32.5   | 9.45±3.98  |
| Lime | ICS-1       | 1.13±0.04 | 0.07±0.01 | 2.35±0.06 | 1.42±0.13 | 0.61±0.05 | 6.85±2.32 | 123.33±48.79 | 67.59±29.31   | 20.54±7.67 | 267.45±34.38  | 15.8±2.52   | 692.91±38.87  | 334.29±26.15  | 143.67±10.3   | 1.62±0.53 | 28.72±10.3  | 16.38±8.67  | 4.95±2.31  |
| Lime | ICS-39      | 1.08±0.07 | 0.04±0    | 2.02±0.22 | 0.62±0.13 | 0.38±0.06 | 4.27±1.45 | 112.56±23.96 | 209.96±38.91  | 45.72±4.52 | 384.01±50.8   | 14.16±1.22  | 610.98±71.57  | 219.42±48.84  | 135.21±20.71  | 1.54±0.64 | 39.91±9.34  | 73.85±11.85 | 16.26±2.89 |
| Lime | ICS-6       | 0.96±0.21 | 0.07±0.02 | 2.36±0.05 | 1.81±0.64 | 1.16±0.17 | 5.32±2.37 | 123.16±49.92 | 165.85±47.59  | 54.91±5.6  | 276.89±36.9   | 21±7.27     | 673.51±129.1  | 546.32±258.14 | 344.6±92.76   | 1.55±0.7  | 37.42±18.26 | 49.69±20.04 | 16.29±3.57 |
| Lime | ICS-95      | 1.1±0.14  | 0.04±0.02 | 2.2±0.24  | 1.38±0.16 | 0.88±0.05 | 5.14±1.37 | 110.7±102.55 | 201.62±148.49 | 42.26±8.98 | 369.42±89.6   | 13.99±6.3   | 825.27±125.14 | 452.63±12.22  | 291.9±19.2    | 1.67±0.28 | 34.91±29.83 | 70.56±59.96 | 14.12±4.05 |
| Lime | ICT-1026    | 1.1±0.13  | 0.07±0.04 | 1.91±0.04 | 1.99±0.61 | 1.29±0.4  | 6.68±1.25 | 123.75±24.42 | 203.77±155.29 | 42.55±14.5 | 359.15±60.77  | 22.49±11.88 | 680.12±21.4   | 645.44±190.54 | 418.74±128.42 | 2.15±0.24 | 39.95±6.25  | 68.77±57.43 | 13.8±4.58  |
| Lime | ICT-1087    | 1.09±0.1  | 0.05±0.01 | 2.24±0.53 | 1.31±0.16 | 0.65±0.09 | 17.26±6.7 | 127.96±12.72 | 92.34±6.87    | 23.01±4.4  | 455.03±59.52  | 20.66±2.9   | 837.18±193.99 | 542.38±46.55  | 270.65±24.48  | 7.08±2.38 | 53.11±2.56  | 38.35±0.64  | 9.56±1.75  |
| Lime | ICT-1092    | 0.89±0.1  | 0.07±0.01 | 3.53±0.21 | 1.72±0.19 | 0.79±0.1  | 3.47±3.18 | 73±18.33     | 48.34±7.49    | 29.93±5.27 | 267.05±29.28  | 19.92±3.29  | 946.79±153.11 | 514.91±52.34  | 236.01±26.19  | 1.04±0.94 | 21.78±5.24  | 14.44±2.08  | 8.93±1.47  |

|      |          |           |           |           |           |           |            |              |               |             |               |            |               |              |              |           |             |             |            |
|------|----------|-----------|-----------|-----------|-----------|-----------|------------|--------------|---------------|-------------|---------------|------------|---------------|--------------|--------------|-----------|-------------|-------------|------------|
| Lime | ICT-1112 | 1.18±0.05 | 0.05±0.02 | 2.87±0.32 | 1.68±0.11 | 0.91±0.02 | 2.69±1.17  | 95.36±27.6   | 86.47±56.35   | 30.46±6.18  | 352.89±8.95   | 15.96±6.41 | 841.43±59.17  | 501.98±28.71 | 271.42±0.25  | 0.81±0.36 | 28.49±8.4   | 26.01±17.46 | 9.11±2     |
| Lime | ICT-1189 | 1.13±0.02 | 0.06±0.02 | 1.88±0.41 | 0.36±0.15 | 0.25±0.04 | 11.18±4.76 | 175.16±76.97 | 166.61±29.86  | 50.8±6.8    | 388.41±101.25 | 18.25±1.78 | 621.27±59.68  | 128.87±76.83 | 87.34±33.42  | 4.02±2.46 | 56.8±21.25  | 56.45±14.99 | 17.1±3     |
| Lime | ICT-1251 | 1.1±0.04  | 0.04±0.01 | 2.04±0.38 | 0.48±0.02 | 0.28±0.01 | 9.29±2.88  | 114.2±47.96  | 97.58±15.34   | 50.41±12.7  | 299.04±25.07  | 10.78±1.94 | 573.22±50.46  | 131.79±10.48 | 76.46±7.8    | 2.5±0.6   | 30.49±10.28 | 26.42±2.69  | 13.57±2.31 |
| Lime | ICT-1281 | 1±0.26    | 0.09±0.01 | 3.21±0.31 | 1.4±0.18  | 0.94±0.1  | 5.54±0.29  | 109.05±42.05 | 64.83±15.63   | 34.95±6.5   | 284.31±88.38  | 26.21±2.06 | 901.94±61.15  | 397.04±81.1  | 265.45±46.05 | 1.56±0.19 | 31.34±14.93 | 18.4±5.52   | 9.93±2.77  |
| Lime | ICT-1292 | 1.17±0.08 | 0.04±0.01 | 2.17±0.16 | 0.47±0.05 | 0.35±0.05 | 6.08±2.86  | 102.09±8.27  | 193.24±56.96  | 43.12±1.72  | 353.06±31.96  | 12.25±3.76 | 618.22±27.36  | 143.28±26.78 | 106.72±22.07 | 1.8±0.68  | 31.05±4.66  | 59.45±21.05 | 13.06±1.08 |
| Lime | ICT-1506 | 0.91±0.11 | 0.09±0.03 | 2.94±0.31 | 1.93±0.42 | 0.88±0.17 | 3.86±2.13  | 127.08±85.38 | 89.89±24.83   | 32.85±10.79 | 253±24.31     | 25.19±9.42 | 748.49±172.81 | 536.9±131.51 | 246.33±56.77 | 1.08±0.63 | 36±25.93    | 25.17±8.1   | 9.14±3.05  |
| Lime | ICT-2142 | 1.14±0.1  | 0.06±0.01 | 2.72±0.22 | 1.77±0.29 | 0.86±0.12 | 3.06±1.57  | 97.27±30.83  | 87.38±28.68   | 27.6±4.51   | 340.24±13.94  | 18.97±2.86 | 899.09±14.54  | 526.55±88.44 | 254.99±31.98 | 0.94±0.53 | 29.04±9.67  | 26.46±10.26 | 8.29±1.83  |
| Lime | ICT-2161 | 1.04±0.02 | 0.06±0.01 | 2.23±0.34 | 1.56±0.1  | 0.84±0.1  | 4.19±1.76  | 89.18±16.79  | 76.78±33.99   | 26.76±1.28  | 303.64±7.54   | 18.52±2.05 | 602.77±120    | 454.97±14.31 | 246.17±29.49 | 1.23±0.52 | 25.93±3.97  | 22.61±10.61 | 7.82±0.56  |
| Lime | ICT-2171 | 1.18±0.03 | 0.09±0.03 | 2.15±0.22 | 1.45±0.18 | 0.67±0.12 | 4.84±0.63  | 89.47±7.89   | 152.73±31.98  | 18.89±1.7   | 422.56±11.04  | 33.48±8.63 | 634.35±163.07 | 520.25±55.59 | 239.29±39.61 | 1.75±0.31 | 32.11±2.45  | 54.66±9.89  | 6.8±0.92   |
| Lime | ICT-2172 | 1.09±0.08 | 0.09±0.01 | 2.04±0.08 | 1.21±0.06 | 0.91±0.01 | 4.53±0.31  | 108.64±11.32 | 226.43±113.28 | 36.55±9.51  | 401.74±75.83  | 33.01±6.02 | 628.8±105.48  | 442.84±46.45 | 333.02±43.62 | 1.66±0.33 | 39.99±8.33  | 79.31±33.5  | 13.09±2.21 |
| Lime | ICT-2173 | 1.22±0.25 | 0.08±0.02 | 3.04±0.29 | 3.26±0.2  | 1.84±0.17 | 5.41±0.42  | 101.11±7.58  | 247.42±165.95 | 33.35±5.94  | 477.92±102.26 | 30.04±6.39 | 937.79±126.87 | 1275.2±59.74 | 718.89±56.15 | 2.12±0.16 | 39.51±2.39  | 96.65±64.98 | 13.04±2.33 |
| Lime | ICT-2653 | 1.18±0.14 | 0.06±0.01 | 2.39±0.15 | 1.24±0.08 | 0.86±0.08 | 6.61±2.04  | 113.61±26.2  | 79.58±12.06   | 30.83±1.78  | 388.43±30.14  | 19.94±3.92 | 634.78±58.74  | 410±11.71    | 284.52±40.14 | 2.17±0.61 | 37.72±9.29  | 26.36±4.21  | 10.21±0.83 |
| Lime | IMC-67   | 1.15±0.05 | 0.07±0.01 | 2.48±0.79 | 1.12±0.09 | 0.75±0.03 | 11.25±6.04 | 126.2±12.07  | 56.37±1.39    | 34.81±6.89  | 327.31±30.23  | 21±3.21    | 685.13±225.3  | 318.37±6.57  | 215.36±24.81 | 3.14±1.57 | 35.86±1.7   | 16.07±1.08  | 9.86±1.47  |

|      |                |               |               |               |               |               |               |                  |                  |                 |                  |                 |                   |                   |                  |               |                 |                 |                |
|------|----------------|---------------|---------------|---------------|---------------|---------------|---------------|------------------|------------------|-----------------|------------------|-----------------|-------------------|-------------------|------------------|---------------|-----------------|-----------------|----------------|
| Lime | IPIRAN<br>GA-1 | 1.08±<br>0.08 | 0.07±<br>0    | 1.87±<br>0.1  | 1.52±<br>0.17 | 0.85±<br>0.11 | 3.2±1.4<br>6  | 96.69±12<br>.64  | 114.28±42<br>.2  | 27.42±1<br>.16  | 406.88±6<br>5.6  | 26.38±2<br>.87  | 560.88±78<br>.88  | 570.03±6<br>9.9   | 321.61±5<br>2.79 | 1.19±0.<br>49 | 36.21±3<br>.37  | 43.15±16.<br>06 | 10.37±1<br>.59 |
| Lime | NUC-<br>156    | 1.23±<br>0.08 | 0.08±<br>0    | 2.19±<br>0.17 | 1.72±<br>0.19 | 1.03±<br>0.04 | 5.3±2.1<br>1  | 106.81±1<br>7.17 | 82.95±13.<br>59  | 38.06±3<br>.32  | 315.4±23.<br>08  | 20.5±0.<br>29   | 499.09±29<br>.7   | 440.44±4<br>1.83  | 263.93±7.<br>92  | 1.36±0.<br>52 | 27.42±4<br>.81  | 21.26±3.5<br>.  | 9.75±0.<br>72  |
| Lime | PAS-100        | 1.05±<br>0.06 | 0.1±0.<br>03  | 3.32±<br>0.15 | 2.17±<br>0.12 | 0.85±<br>0.06 | 3.49±0.<br>95 | 72.95±26<br>.93  | 75.57±20.<br>02  | 35.84±7<br>.34  | 313.92±5<br>2.9  | 31.38±1<br>1.93 | 847.83±13<br>0.98 | 646.28±1<br>04.92 | 253.79±5<br>5.54 | 1.02±0.<br>15 | 21.98±9<br>.76  | 23.06±9.7<br>.  | 10.7±2.<br>9   |
| Lime | PAS-105        | 1.19±<br>0.11 | 0.09±<br>0.03 | 1.93±<br>0.24 | 2.24±<br>0.37 | 0.92±<br>0.08 | 5.88±1.<br>52 | 136.83±3<br>0.05 | 193.54±87<br>.29 | 50.01±1<br>1.09 | 378.78±5<br>9.23 | 28.23±6<br>.16  | 502.59±78<br>.48  | 703.88±6<br>4.69  | 294.12±4<br>5.91 | 1.85±0.<br>41 | 42.79±5<br>.18  | 67.06±45.<br>83 | 16.29±6<br>.21 |
| Lime | PAS-91         | 1.16±<br>0.03 | 0.09±<br>0.02 | 1.87±<br>0.14 | 2.48±<br>0.19 | 1.69±<br>0.05 | 5.43±0.<br>84 | 98.7±18.<br>29   | 96.93±23.<br>75  | 37.22±4<br>.46  | 405.65±4<br>0.17 | 31.82±9<br>.08  | 651.92±47<br>.79  | 871.23±1<br>40.11 | 592.46±7<br>7.63 | 1.91±0.<br>45 | 34.59±8<br>.06  | 33.35±4.6<br>1  | 13.01±2<br>.04 |
| Lime | PAS-93         | 1.1±0.<br>08  | 0.09±<br>0.02 | 1.87±<br>0.14 | 2.44±<br>0.54 | 1.42±<br>0.18 | 5.92±2.<br>16 | 143.75±4<br>3.05 | 190.32±13<br>5.6 | 43.77±1<br>1.99 | 368.89±8<br>5.05 | 30.89±4<br>.76  | 599.61±23<br>.88  | 797.78±9<br>7.13  | 469.07±3<br>9.66 | 1.92±0.<br>47 | 47.54±1<br>3.85 | 63.69±45.<br>75 | 14.19±1<br>.95 |
| Lime | PH-09          | 1.13±<br>0.03 | 0.04±<br>0.01 | 1.96±<br>0.27 | 0.37±<br>0.1  | 0.23±<br>0.05 | 4.63±0.<br>51 | 55.62±38<br>.79  | 130.76±18<br>.83 | 59.04±2<br>8.47 | 349.85±2<br>1.63 | 11.54±4<br>.41  | 655.26±16<br>3.9  | 114.88±3<br>1.73  | 72.68±18.<br>35  | 1.45±0.<br>27 | 17.61±1<br>3.35 | 40.64±6.6<br>8  | 17.88±7<br>.01 |
| Lime | PH-144         | 1.26±<br>0.04 | 0.06±<br>0.01 | 2.24±<br>0.12 | 1.34±<br>0.37 | 0.93±<br>0.24 | 7.77±5.<br>48 | 119.24±5<br>1.18 | 106.5±16.<br>55  | 33.85±6<br>.03  | 434.93±8<br>5.64 | 21.65±2<br>.94  | 796.21±48<br>.81  | 446.55±4<br>0.82  | 313.03±3<br>6.89 | 2.58±1.<br>77 | 43.43±2<br>6.71 | 36.17±4.0<br>3  | 11.54±2<br>.02 |
| Lime | PH-15          | 1.15±<br>0.05 | 0.07±<br>0.01 | 1.79±<br>0.2  | 1.34±<br>0.29 | 0.73±<br>0.15 | 1.51±0.<br>31 | 105.05±6<br>2.2  | 89.16±28.<br>14  | 31.53±6<br>.72  | 356.55±5<br>8.58 | 21.32±0<br>.37  | 544.09±30<br>.99  | 414.91±1<br>09.41 | 225.92±5<br>2.16 | 0.46±0.<br>04 | 32.13±1<br>8.16 | 26.93±6.9<br>.  | 9.63±1.<br>65  |
| Lime | PH-16          | 1.16±<br>0.06 | 0.16±<br>0.14 | 2.55±<br>0.63 | 2.02±<br>0.46 | 1.04±<br>0.32 | 3.34±2.<br>45 | 116.17±2<br>2    | 117.57±33<br>.37 | 29.22±3<br>.83  | 436.67±7<br>5.62 | 57.42±4<br>7.34 | 760.53±84<br>.1   | 763.52±2<br>14.18 | 399.1±17<br>0.33 | 1.33±1.<br>14 | 42.89±3<br>.42  | 44.18±13.<br>26 | 10.95±1<br>.77 |
| Lime | PH-17          | 1.08±<br>0    | 0.06±<br>0.01 | 2.57±<br>0.36 | 1.53±<br>0.06 | 0.96±<br>0.1  | 6.79±1.<br>25 | 104.13±2<br>6.27 | 141.46±46<br>.36 | 42.42±6<br>.62  | 366.81±4<br>8.25 | 19.07±0<br>.43  | 705.15±13<br>1.65 | 517.03±5<br>0.62  | 322.2±16.<br>37  | 2.28±0.<br>25 | 35.23±8<br>.65  | 46.72±10.<br>8  | 14.29±1<br>.74 |
| Lime | PH-21          | 0.97±<br>0.25 | 0.1±0.<br>05  | 2.11±<br>0.39 | 1.71±<br>0.23 | 0.8±0.<br>06  | 2.37±0.<br>87 | 86.66±40<br>.54  | 86.05±18.<br>57  | 28.96±5<br>.2   | 361.47±1<br>07.2 | 36.64±2<br>0.81 | 763.19±14<br>6.99 | 637.17±1<br>36.07 | 296.69±4<br>4.49 | 0.89±0.<br>36 | 32.89±1<br>7.08 | 32.29±9.4<br>1  | 10.83±2<br>.79 |
| Lime | PH-990         | 1.15±<br>0.17 | 0.06±<br>0.01 | 2.83±<br>0.57 | 1.98±<br>0.37 | 1.13±<br>0.17 | 4.3±1.3<br>7  | 130.97±3<br>5.97 | 146.51±39<br>.95 | 39.36±9<br>.63  | 474±84.8<br>3    | 25.89±4<br>.28  | 933.25±19<br>8.9  | 808±120.<br>27    | 459.81±4<br>6.58 | 1.78±0.<br>66 | 53.71±1<br>5.49 | 60.27±18.<br>15 | 16.29±4<br>.8  |

|      |          |           |           |           |           |           |           |              |               |             |              |            |               |               |               |           |             |             |             |
|------|----------|-----------|-----------|-----------|-----------|-----------|-----------|--------------|---------------|-------------|--------------|------------|---------------|---------------|---------------|-----------|-------------|-------------|-------------|
| Lime | POUND-12 | 1.09±0.02 | 0.09±0.01 | 2.44±0.3  | 1.61±0.06 | 1.02±0.05 | 6.04±4.25 | 111.39±2.54  | 108.51±25.9   | 32.35±0.47  | 297.43±45.75 | 23.83±5.15 | 573.64±117.63 | 439.59±64.11  | 279.04±56.6   | 1.53±0.82 | 29.81±2.55  | 30.32±10.91 | 8.83±1.39   |
| Lime | SCA-6    | 1.01±0.03 | 0.15±0.03 | 1.88±0.11 | 1.53±0.18 | 0.74±0.06 | 1.49±0.18 | 151.13±3.97  | 85.58±41.08   | 27.85±1.14  | 368.1±55.1   | 52.74±8.48 | 600.71±56.62  | 559.97±137.47 | 268.75±54.8   | 0.53±0.04 | 54.8±7.05   | 31.71±17.16 | 10.13±1.65  |
| Lime | TSH-1188 | 1.08±0.05 | 0.07±0    | 3.49±0.29 | 1.24±0.3  | 0.68±0.17 | 3.3±1.9   | 92.86±30.39  | 63.57±45.35   | 26.17±5.94  | 307.46±50.79 | 19.86±3.03 | 971.22±82.69  | 358.25±129.75 | 198.3±74.36   | 0.95±0.55 | 27.17±13.06 | 16.88±9.71  | 7.26±0.78   |
| Lime | TSH-565  | 1.05±0.11 | 0.07±0.01 | 1.96±0.24 | 1.61±0.13 | 0.88±0.07 | 2.21±1.51 | 78.86±13.25  | 62.69±17.91   | 26.5±6.75   | 354.23±38.54 | 24.79±3.86 | 672.34±135.05 | 542.12±41.42  | 296.67±38.26  | 0.76±0.58 | 26.44±4.3   | 21.27±7.3   | 9.01±2.93   |
| Lime | UF-613   | 1.15±0.02 | 0.1±0.02  | 3.03±0.35 | 1.35±0.03 | 0.83±0.05 | 8.23±2.62 | 118.48±35.47 | 71.04±15.34   | 38.43±5.41  | 324.75±44.15 | 27.85±8.38 | 942.9±104.46  | 381.57±53.19  | 233.6±28.68   | 2.4±1.13  | 32.69±5.16  | 20.25±5.51  | 10.92±2.22  |
| Lime | UF-667   | 1.04±0.02 | 0.08±0.02 | 1.97±0.2  | 1.55±0.11 | 0.7±0.05  | 2.98±1.4  | 175.34±74.42 | 96.71±77.88   | 29.97±2.59  | 383.76±40.26 | 29.5±6.12  | 740.35±80.92  | 573.12±42.01  | 256.75±13     | 1.07±0.43 | 63.7±22.48  | 35.61±27.73 | 11.04±0.6   |
| Lime | UGU-112  | 0.8±0.04  | 0.2±0.04  | 2.28±0.23 | 1.7±0.15  | 0.81±0.05 | 2.01±0.74 | 140.74±32.83 | 100.97±57.18  | 30.94±4.28  | 226.58±18.36 | 57.25±9.38 | 618.84±74.49  | 481.35±63.71  | 228.82±37.3   | 0.56±0.15 | 39.89±10.76 | 27.44±12.96 | 8.7±1.06    |
| Lime | UGU-126  | 0.57±0.03 | 0.09±0.02 | 2.07±0.07 | 1.92±0.05 | 0.81±0.06 | 4.14±1.68 | 102.27±4.71  | 136.84±67.14  | 32.38±5.06  | 213.37±14.67 | 34.82±4.8  | 414.27±108.02 | 720.73±75.83  | 302.58±7.67   | 1.59±0.79 | 38.3±2.81   | 52.82±29.76 | 12.26±3.01  |
| Lime | UGU-130  | 0.71±0.05 | 0.11±0.04 | 2.21±0.29 | 2.07±0.46 | 0.85±0.09 | 6.31±2.39 | 133.82±90.49 | 52.99±27.19   | 44.09±8.96  | 165.4±14.23  | 26.53±9.6  | 330.74±101.43 | 483.39±118.69 | 198.78±31.46  | 1.47±0.53 | 30.47±18.67 | 12.6±7      | 10.35±2.67  |
| Lime | UNG-53   | 1.1±0.09  | 0.05±0.01 | 2.57±0.07 | 1.79±0.53 | 1.23±0.33 | 5.12±2.23 | 144.34±64.14 | 211.36±132.93 | 51.29±13.38 | 363.37±63.96 | 16.74±4.86 | 731.57±50.58  | 599.06±214.83 | 411.21±133.26 | 1.76±0.91 | 47.16±21.02 | 70.72±45.27 | 17.04±5.19  |
| Lime | UNG-73   | 1.04±0.04 | 0.1±0.02  | 2.18±0.28 | 1.65±0.25 | 0.96±0.05 | 7.68±1.23 | 102.91±11.01 | 102.22±22.07  | 43.19±3     | 343.55±33.17 | 31.98±6.74 | 469.44±67.26  | 542.31±77.55  | 316.09±5.88   | 2.54±0.51 | 33.86±4.58  | 33.65±8.04  | 14.16±0.19  |
| Lime | UNG-76   | 0.67±0.05 | 0.09±0.02 | 2.42±0.2  | 1.69±0.21 | 0.93±0.15 | 5.52±3.98 | 48.71±38.61  | 83.45±101.22  | 25.46±15.23 | 220.39±6.24  | 28.67±5.89 | 276.81±128.79 | 557.36±88.46  | 308.76±60.43  | 1.84±1.35 | 16.22±13.34 | 28.07±34.68 | 8.4±5.15    |
| Lime | UNG-77   | 1.12±0.11 | 0.05±0.01 | 2.48±0.15 | 0.49±0.12 | 0.4±0.07  | 5.77±1.33 | 159.77±23.37 | 162.58±36.27  | 92.99±71.55 | 387.36±70.89 | 17.24±4.26 | 707.25±71.13  | 169.25±55.91  | 136.66±20.67  | 1.99±0.54 | 54.47±3.57  | 56.42±16.03 | 33.01±27.52 |

|         |             |           |           |           |           |           |            |              |                |             |              |            |               |               |              |           |             |               |            |
|---------|-------------|-----------|-----------|-----------|-----------|-----------|------------|--------------|----------------|-------------|--------------|------------|---------------|---------------|--------------|-----------|-------------|---------------|------------|
| No lime | AYP-15      | 1.13±0.12 | 0.06±0.01 | 1.71±0.05 | 1.28±0.23 | 0.53±0.06 | 5.85±0.67  | 186.43±1.97  | 1166.11±286.9  | 58.9±11.17  | 351.93±67.22 | 17.57±4.44 | 636.78±9.45   | 394.36±84.39  | 162.43±23.9  | 1.79±0.05 | 57.5±5.05   | 361.27±104.15 | 18.2±4.13  |
| No lime | AYP-20      | 1.2±0.07  | 0.11±0.02 | 1.48±0.04 | 1.46±0.05 | 0.65±0.09 | 11.33±1.53 | 143.33±40.2  | 1197±276.44    | 83.67±12.22 | 180.45±81.81 | 16.55±9.02 | 325.77±12.31  | 216.11±87.91  | 97.72±50.26  | 1.69±0.71 | 22.01±11.34 | 182.24±88.42  | 12.18±4.12 |
| No lime | AYP-22      | 0.69±0.04 | 0.06±0.01 | 1.97±0.19 | 1.22±0.16 | 0.64±0.04 | 6±2        | 93.67±31.79  | 1564.67±504.68 | 60.67±4.93  | 194.65±13.67 | 17.78±3.29 | 579.07±24.53  | 342.65±49.43  | 179.64±13.07 | 1.68±0.55 | 26.35±9.26  | 440.04±146.95 | 17.03±1.51 |
| No lime | BN-34       | 1.25±0.02 | 0.05±0.01 | 1.51±0.18 | 0.93±0.05 | 0.57±0.04 | 5.33±1.53  | 123.67±18.61 | 1652.33±196.23 | 66±1        | 385.57±42.29 | 16.35±1.11 | 435.1±65.4    | 285.87±35.41  | 174.21±13.45 | 1.62±0.3  | 38.37±8.97  | 512.68±109.96 | 20.35±2.08 |
| No lime | BS-01       | 1.23±0.07 | 0.06±0.02 | 1.54±0.51 | 1.36±0.03 | 0.63±0.02 | 4.62±2.46  | 120.61±39.51 | 1133.21±277.72 | 50.98±4.43  | 385.98±18.74 | 17.81±4.69 | 401.39±62.53  | 429.12±11.33  | 198.24±4.31  | 1.46±0.78 | 38.04±12.79 | 356.98±89.28  | 16.05±1.55 |
| No lime | CA-14       | 1.17±0.04 | 0.04±0.01 | 2.07±0.08 | 0.93±0.14 | 0.46±0.05 | 6.18±2.19  | 278.34±51.24 | 1079.69±149.06 | 43.79±1.39  | 384.4±49.92  | 11.91±1.08 | 666.62±101.3  | 305.27±46.82  | 150.03±9.89  | 2±0.61    | 89.94±2.31  | 351.88±38.79  | 14.39±1.93 |
| No lime | CCN-10      | 1.15±0.03 | 0.07±0.01 | 1.55±0.02 | 1.08±0.04 | 0.49±0.02 | 7.78±0.37  | 163.29±56.68 | 1076.42±223.67 | 30.4±16.33  | 416.41±20.94 | 24.06±2.6  | 526.97±48.83  | 393.29±17.12  | 179.21±10.91 | 2.83±0.21 | 58.63±16.75 | 387.54±51.6   | 10.76±5.22 |
| No lime | CCN-51      | 1.22±0.04 | 0.05±0.01 | 1.51±0.08 | 1.17±0.41 | 0.68±0.15 | 4.88±0.51  | 117.38±10.09 | 1047.73±126.89 | 44.77±2.18  | 462.45±26.12 | 17.74±2.82 | 508±73.99     | 444.22±154.71 | 258.85±57.69 | 1.84±0.16 | 44.38±1.95  | 398.07±60.55  | 16.98±1.38 |
| No lime | CEPEC-2002  | 1.05±0.16 | 0.05±0.02 | 1.79±0.07 | 1.18±0.15 | 0.66±0.1  | 2.67±1.53  | 76.33±29.37  | 1356±229.19    | 60.33±7.77  | 351.11±62.22 | 17.52±3.09 | 495.22±93.27  | 398.77±92.88  | 223.23±60.87 | 0.87±0.45 | 26.28±12.88 | 461.69±129.58 | 20.45±5.06 |
| No lime | CP-2005-C10 | 1.23±0.13 | 0.05±0    | 1.84±0.09 | 1.22±0.02 | 0.66±0.02 | 2.67±1.53  | 123±29.1     | 2018.67±198.49 | 56.33±2.52  | 340.16±72.96 | 13.75±1.69 | 589.4±12.83   | 335.89±36.3   | 182.03±18.34 | 0.7±0.35  | 33.2±3.92   | 553.47±72.71  | 15.52±2.44 |
| No lime | CP-49-C10   | 1.23±0.06 | 0.04±0.02 | 1.89±0.3  | 1.12±0.1  | 0.6±0.05  | 4.47±1     | 129.75±19.26 | 749.4±324.97   | 44.07±7.65  | 398.43±28.08 | 12.04±5.53 | 581.76±127.99 | 361.7±17.86   | 193.71±16.34 | 1.44±0.24 | 41.99±5.03  | 239.11±94.32  | 14.26±2.12 |
| No lime | CP-53-C10   | 1.28±0.04 | 0.06±0.01 | 1.33±0.06 | 1.27±0.06 | 0.63±0.03 | 3.65±0.8   | 120.29±12.04 | 910.94±92.29   | 47.96±5.72  | 404.74±20.48 | 18.07±4.75 | 390.53±36.24  | 402.76±26.93  | 198.01±7.84  | 1.14±0.16 | 38.07±4.71  | 290.13±51.23  | 15.09±0.47 |
| No lime | EET-400     | 1.15±0.09 | 0.07±0.01 | 1.97±0.12 | 1.18±0.16 | 0.77±0.06 | 7.33±2.08  | 131.33±17.56 | 2141±235.77    | 59.33±6.51  | 350.95±49.22 | 20.29±1.52 | 574.72±56.77  | 359.12±31.1   | 233.43±15.5  | 2.24±0.65 | 40.53±9.19  | 656.15±119.49 | 18±0.52    |



|         |          |           |           |           |           |           |           |              |                |            |               |             |               |              |              |           |             |               |            |
|---------|----------|-----------|-----------|-----------|-----------|-----------|-----------|--------------|----------------|------------|---------------|-------------|---------------|--------------|--------------|-----------|-------------|---------------|------------|
| No lime | H-10     | 0.94±0.12 | 0.03±0.01 | 3.12±0.38 | 1.06±0.03 | 0.56±0.04 | 6.42±1.34 | 214.31±98.15 | 1084.36±162.17 | 49.97±1.27 | 251.93±28.79  | 8.97±3.2    | 966.57±378.88 | 283.59±11.54 | 151.25±12.97 | 1.72±0.37 | 57.26±25.32 | 291.27±46.27  | 13.41±0.47 |
| No lime | ICS-1    | 1.17±0.05 | 0.05±0.01 | 1.76±0.03 | 1.08±0.17 | 0.62±0.05 | 5.33±1.53 | 111.67±14.84 | 1770.67±287.63 | 53.33±4.73 | 346.42±30.99  | 13.85±4.04  | 416.37±36.61  | 315.56±28.34 | 182.82±17.81 | 1.56±0.35 | 32.76±2.3   | 521.29±84.23  | 15.69±0.96 |
| No lime | ICS-39   | 1.12±0.08 | 0.07±0.01 | 1.78±0.07 | 0.95±0.05 | 0.61±0.04 | 5.33±0.58 | 104±35.51    | 1369.33±423.08 | 51±5.29    | 344.73±82.15  | 22.87±7.24  | 630.87±72.84  | 295.45±81.61 | 189.76±51.3  | 1.64±0.35 | 33.2±16.32  | 440.32±227.33 | 15.95±0.41 |
| No lime | ICS-6    | 1.12±0.03 | 0.09±0.01 | 2.09±0.19 | 0.94±0.09 | 0.74±0.16 | 7.67±5.03 | 75±7.81      | 1336.67±626.08 | 53.67±4.16 | 319.87±59.63  | 26.43±4.04  | 620.93±135.5  | 268.64±68.83 | 209.97±54.91 | 2.25±1.79 | 21.12±2.43  | 405.78±235.35 | 15.31±0.36 |
| No lime | ICS-95   | 1.14±0.15 | 0.05±0.01 | 1.51±0.24 | 1.11±0.05 | 0.65±0.07 | 5±1       | 104±43       | 1614.67±526.26 | 54.67±4.93 | 432.77±110.32 | 17.69±4.19  | 495.06±45.83  | 415.36±56.15 | 244.64±34.63 | 1.9±0.51  | 40.45±21.22 | 606.05±217.83 | 20.54±0.49 |
| No lime | ICT-1026 | 1.14±0.14 | 0.06±0.01 | 2.26±0.61 | 1.21±0.17 | 0.56±0.04 | 7.47±0.49 | 173.78±7.23  | 980.4±116.98   | 54.02±7.96 | 405.55±44.93  | 21.38±3.67  | 733.16±198.62 | 431.13±63.9  | 200.6±15.59  | 2.66±0.2  | 61.89±3.12  | 349.3±44.98   | 19.25±0.01 |
| No lime | ICT-1087 | 1.13±0.1  | 0.07±0.01 | 1.5±0.14  | 1.18±0.36 | 0.56±0.08 | 6±1       | 77.67±68.79  | 1000±618.47    | 45±18.19   | 424.35±66.02  | 27.44±3.16  | 621.29±29.21  | 436.57±120.1 | 206.41±13.89 | 2.26±0.48 | 30.74±28.17 | 388.3±259.01  | 17.23±0.02 |
| No lime | ICT-1092 | 0.93±0.11 | 0.09±0.03 | 1.41±0.25 | 1.12±0.04 | 0.41±0.06 | 4.72±1.62 | 88.04±15.11  | 1078.98±251.31 | 53.08±0.71 | 247.57±33.65  | 25.28±8.09  | 423.1±79.65   | 301.56±44.6  | 112.82±34.06 | 1.22±0.26 | 24.04±7.45  | 295.94±105.64 | 14.28±0.34 |
| No lime | ICT-1112 | 1.22±0.05 | 0.05±0.01 | 1.96±0.04 | 1±0.05    | 0.54±0.01 | 5.56±0.99 | 123.09±29.49 | 954.13±291.55  | 46.8±1.36  | 360.72±38.54  | 15.69±1.75  | 584.89±23.89  | 293.98±33.56 | 160.41±18.98 | 1.66±0.48 | 35.93±6.6   | 275.85±60.99  | 13.83±0.79 |
| No lime | ICT-1189 | 1.17±0.02 | 0.06±0.02 | 1.92±0.47 | 1.01±0.2  | 0.58±0.09 | 8.67±1.15 | 105.67±32.87 | 1656.67±132.31 | 51.33±7.51 | 393.87±51.71  | 19.05±7.53  | 632.75±77     | 335.92±35.7  | 191.77±18.92 | 2.94±0.7  | 36.31±15.03 | 554.44±45.48  | 17.07±0.72 |
| No lime | ICT-1251 | 1.15±0.06 | 0.11±0.03 | 2.04±0.04 | 1.12±0.07 | 0.77±0.07 | 8.33±0.58 | 109.33±40.77 | 1908.33±275.01 | 65±10.44   | 327.66±50.55  | 30.93±11.03 | 556.76±51.28  | 320.18±41.7  | 218.31±15.69 | 2.4±0.51  | 30.22±8.63  | 539.05±47.27  | 18.43±0.71 |
| No lime | ICT-1281 | 1.04±0.27 | 0.07±0.01 | 1.93±0.16 | 1.13±0.08 | 0.58±0.08 | 8.99±1.33 | 78.6±5.91    | 1058.48±113.53 | 51.08±9.43 | 298.53±96.24  | 20.63±3.06  | 540.52±16.67  | 319.21±45.44 | 164.59±31.46 | 2.53±0.33 | 22.18±2.24  | 298.16±32.12  | 14.39±0.8  |
| No lime | ICT-1292 | 1.21±0.09 | 0.06±0.01 | 1.74±0.05 | 1.1±0.1   | 0.67±0.07 | 7.33±2.31 | 104.33±18.88 | 1909±131.53    | 62±5.29    | 345.78±18.84  | 17.06±2.31  | 526.42±27.09  | 314.21±18.53 | 189.64±10.16 | 2.11±0.76 | 29.6±3.75   | 543.72±9.37   | 17.67±0.24 |

|         |             |           |           |           |           |           |            |               |                 |            |               |             |                 |                |               |           |              |                |            |
|---------|-------------|-----------|-----------|-----------|-----------|-----------|------------|---------------|-----------------|------------|---------------|-------------|-----------------|----------------|---------------|-----------|--------------|----------------|------------|
| No lime | ICT-1506    | 0.94±0.11 | 0.07±0.02 | 1.69±0.11 | 1.41±0.14 | 0.59±0.04 | 7.56±0.22  | 83.68±8.38    | 997.57±12.7.16  | 62.19±9.1  | 239.84±5.6.59 | 17.6±4.35   | 470.99±49.86    | 357.06±6.5.1   | 149.03±1.3.4  | 1.91±0.19 | 20.99±1.81   | 251.22±3.8.75  | 15.77±3.7  |
| No lime | ICT-2142    | 1.18±0.1  | 0.06±0    | 1.28±0.47 | 1.09±0.1  | 0.5±0.01  | 4.79±1.33  | 70.53±7.66    | 871.19±16.4.75  | 52.59±3.58 | 393.11±5.3.26 | 19.88±1.48  | 379.82±12.7.28  | 362.17±5.3.76  | 165.79±1.4.5  | 1.57±0.36 | 23.48±4.21   | 290.76±7.0.1   | 17.38±0.84 |
| No lime | ICT-2161    | 1.07±0.02 | 0.06±0.01 | 1.25±0.28 | 1.01±0.07 | 0.55±0.03 | 6.9±0.47   | 157.11±1.7.42 | 963.33±33.1.84  | 49.19±5    | 290.51±3.2.4  | 15.11±1.26  | 366.75±92.0.4   | 274.97±5.0.14  | 150.49±2.6.05 | 1.88±0.35 | 42.9±9.32    | 268.23±1.17.55 | 13.37±2.56 |
| No lime | ICT-2171    | 1.22±0.04 | 0.09±0.02 | 1.44±0.06 | 0.97±0.13 | 0.5±0.01  | 13.33±0.58 | 108.67±3.9.88 | 1081.33±7.25.31 | 51±15.39   | 355.64±5.4    | 27.36±7.14  | 518.55±27.33    | 286.75±7.9.49  | 147.01±2.4.37 | 3.88±0.54 | 33.01±1.5.89 | 337.6±24.6.6   | 15.41±6.6  |
| No lime | ICT-2172    | 1.13±0.08 | 0.05±0.01 | 2.36±0.26 | 0.84±0.04 | 0.45±0.02 | 8.65±1.72  | 120.24±1.5.22 | 648.11±14.0.23  | 41.08±1.96 | 347.57±5.7.92 | 16.53±4.1   | 856.1±39.79     | 258.08±2.7.54  | 137.8±15.42   | 2.66±0.7  | 36.59±3.0.4  | 196.49±3.0.07  | 12.61±1.84 |
| No lime | ICT-2173    | 1.26±0.26 | 0.06±0.01 | 3±0.11    | 1.44±0.18 | 0.66±0.1  | 5.25±0.76  | 77.68±4.75    | 987.92±20.3.89  | 50.26±6.45 | 384.88±5.9.18 | 18.6±4.12   | 1172.7±33.61    | 444.65±7.7.24  | 204.53±3.6.32 | 1.62±0.34 | 23.9±1.82    | 301.78±4.8.22  | 15.38±0.83 |
| No lime | ICT-2653    | 1.22±0.14 | 0.07±0.02 | 2.05±0.17 | 0.97±0.05 | 0.56±0.05 | 10.24±2.61 | 124.94±8.87   | 991.72±19.1.45  | 45.54±5.45 | 326.35±6.5.21 | 19.1±4.01   | 681.75±83.84    | 256.09±1.4.49  | 147.41±1.2.03 | 2.68±0.4  | 33.07±1.8.9  | 261.53±4.1.1   | 12.14±2.3  |
| No lime | IMC-67      | 1.19±0.05 | 0.08±0.01 | 2.64±0.16 | 1.19±0.19 | 0.61±0.01 | 5.08±1.48  | 75.66±9.62    | 865.96±13.4.31  | 43.43±3.19 | 326.95±7.59   | 23.04±2.75  | 752.12±15.0.4   | 328.08±4.1.04  | 168.38±1.1.23 | 1.39±0.32 | 20.78±1.48   | 240.18±4.9.79  | 12.02±1.53 |
| No lime | IPIRAN GA-1 | 1.12±0.08 | 0.05±0.01 | 0.8±0.28  | 1.02±0.19 | 0.46±0.1  | 6.78±1.9   | 154±44.16     | 866.33±24.6.03  | 50.84±6.91 | 337.47±7.3.37 | 14.13±3.53  | 293.62±82.19    | 311.4±10.8.94  | 141.69±5.4.85 | 2.01±0.42 | 46.78±1.6.92 | 261.34±8.4.62  | 15.39±3.93 |
| No lime | NUC-156     | 1.18±0.03 | 0.06±0.03 | 1.94±0.13 | 1.5±0.09  | 0.54±0.08 | 8.69±0.48  | 212.58±4.1.18 | 1265.59±6.3.04  | 73.95±5.78 | 272.21±4.0.32 | 13.27±4.72  | 496.65±37.8     | 345.26±5.4.03  | 125.6±33.1    | 1.99±0.18 | 49.39±1.5.27 | 290.5±38.51    | 17.07±3.16 |
| No lime | PAS-100     | 1.34±0.03 | 0.08±0.01 | 1.81±0.12 | 1.58±0.2  | 0.52±0.1  | 5.9±1.03   | 86.77±3.31    | 997.56±13.1.1   | 47.83±5.83 | 341.39±4.7.08 | 19.35±2.0.4 | 538.42±93.43    | 407.38±1.12.46 | 135.32±4.0.79 | 1.48±0.09 | 22.17±3.8.9  | 253.69±4.1.83  | 12.3±2.96  |
| No lime | PAS-105     | 1.5±0.04  | 0.14±0.03 | 1.58±0.15 | 1.52±0.04 | 0.66±0.06 | 4.67±3.06  | 116.33±1.7.04 | 2084.67±6.4.05  | 90±9.85    | 389.84±2.2.81 | 35.2±6.34   | 507.69±11.1.46  | 395.28±2.9.03  | 171.34±1.9.32 | 1.19±0.74 | 30.15±4.43   | 540.38±2.7.04  | 23.26±1.59 |
| No lime | PAS-91      | 1.13±0.08 | 0.06±0.02 | 3.08±0.37 | 1.27±0.15 | 0.61±0.06 | 6.18±0.21  | 215.42±6.9.29 | 1082±136.33     | 55.36±4.05 | 396.59±5.7.35 | 21.82±3.57  | 1082.45±2.17.38 | 443.21±5.4.51  | 213.94±2.6.95 | 2.16±0.21 | 74.61±2.3.43 | 376.84±5.1.8   | 19.23±0.53 |

|         |          |           |           |           |           |           |           |              |                |            |              |             |               |              |              |           |             |               |            |
|---------|----------|-----------|-----------|-----------|-----------|-----------|-----------|--------------|----------------|------------|--------------|-------------|---------------|--------------|--------------|-----------|-------------|---------------|------------|
| No lime | PAS-93   | 1.13±0.08 | 0.06±0.02 | 2.31±0.18 | 1.27±0.15 | 0.61±0.06 | 6.18±0.21 | 215.42±69.29 | 1082±136.33    | 55.36±4.05 | 364.71±49.85 | 20.27±4.82  | 767.49±91.11  | 406.27±10.57 | 196.03±5.07  | 1.99±0.16 | 67.85±16.29 | 345.03±9.67   | 17.81±2.26 |
| No lime | PH-09    | 1.17±0.03 | 0.07±0.02 | 1.54±0.32 | 0.92±0.05 | 0.55±0.05 | 6±3       | 66±20.07     | 1265±77.02     | 43.67±4.04 | 385.04±34.95 | 23.22±7.1   | 479.41±121.16 | 304.44±40.77 | 183±25.56    | 2±0.99    | 21.68±6.02  | 419.8±71.13   | 14.49±2.63 |
| No lime | PH-144   | 1.3±0.04  | 0.04±0    | 1.99±0.35 | 1.08±0.08 | 0.58±0.07 | 5.39±0.76 | 128.58±16.19 | 823.76±255.95  | 50.05±3.72 | 463.77±44.88 | 14.22±1.08  | 673.08±51.11  | 383.95±55.41 | 207.36±39.35 | 1.92±0.33 | 45.99±9     | 296.02±108.98 | 17.83±2.36 |
| No lime | PH-15    | 1.19±0.05 | 0.03±0    | 1.22±0.57 | 1.01±0.02 | 0.54±0.03 | 4.27±1.59 | 177.33±52.93 | 1036.5±115.56  | 44.29±6.04 | 364.82±44.26 | 9.16±0.81   | 364.96±131.58 | 308.12±26.84 | 163.26±6.84  | 1.3±0.52  | 54.44±19.18 | 316.33±47.45  | 13.41±0.83 |
| No lime | PH-16    | 1.2±0.06  | 0.04±0.02 | 1.98±0.44 | 1.08±0.1  | 0.59±0.04 | 5.07±1.02 | 102.69±7.91  | 937.59±127.16  | 50.38±5.68 | 365.63±48.55 | 13.24±4.66  | 754.95±258.74 | 326.47±30.4  | 178.37±20.06 | 1.52±0.2  | 31.18±3.13  | 282.87±18.79  | 15.24±1.14 |
| No lime | PH-17    | 1.12±0    | 0.06±0.01 | 1.87±0.11 | 1.1±0.05  | 0.68±0.03 | 5.67±3.79 | 62.33±67.66  | 956.33±623.52  | 31±20.07   | 307.93±37.88 | 17.41±2.53  | 631±48.26     | 302.46±41.23 | 188.12±27.87 | 1.48±0.82 | 16.79±18.6  | 249.35±148.43 | 8.45±5.47  |
| No lime | PH-21    | 1.16±0.04 | 0.07±0.05 | 1.6±0.02  | 1.14±0.17 | 0.62±0.1  | 4.04±0.69 | 152.85±39.75 | 1065.72±74.62  | 50.67±1.93 | 420.93±9.21  | 23.9±16.38  | 594.84±47.87  | 414.52±67.6  | 225.15±32.89 | 1.46±0.26 | 55.51±15.63 | 385.88±30.75  | 18.35±0.94 |
| No lime | PH-990   | 1.19±0.17 | 0.06±0.02 | 2.1±0.18  | 1.25±0.05 | 0.48±0.04 | 4.2±1.35  | 118.42±3.03  | 1204.63±44.97  | 50.81±5.72 | 394.29±69.27 | 18.72±5.41  | 858.19±51.25  | 412.22±28.94 | 158.56±19.55 | 1.38±0.4  | 39.03±1.72  | 397.21±26.35  | 16.79±2.5  |
| No lime | POUND-12 | 1.14±0.01 | 0.05±0.01 | 1.8±0.02  | 1.39±0.35 | 0.66±0.08 | 7.69±1.78 | 181.76±10.83 | 821.15±519.15  | 66.27±2.81 | 271.94±63.64 | 11.86±3.68  | 489.96±71.97  | 318.36±6.83  | 155.78±31.25 | 1.87±0.73 | 42.94±8.68  | 214.27±152.12 | 15.83±4.13 |
| No lime | SCA-6    | 1.05±0.03 | 0.04±0.02 | 1.74±0.05 | 1.07±0.06 | 0.49±0.04 | 6.82±0.88 | 193.61±32.41 | 1073.26±81.74  | 52.34±6.93 | 338.63±59.58 | 13.39±7.96  | 629.82±66.92  | 342.38±32.64 | 157±10.9     | 2.16±0.06 | 61.26±6.07  | 341.81±28.05  | 16.59±1.08 |
| No lime | TSH-1188 | 1.12±0.05 | 0.05±0.02 | 1.18±0.16 | 0.99±0.05 | 0.51±0.02 | 5.1±0.84  | 83.45±4.61   | 964.55±135.24  | 44.76±5.96 | 313.37±24.47 | 15.29±8.11  | 340.24±96.14  | 276.2±35.22  | 141.99±19.38 | 1.41±0.2  | 23.26±1.64  | 272.23±63.77  | 12.57±2.49 |
| No lime | TSH-565  | 1.1±0.11  | 0.09±0.1  | 1.32±0.14 | 1.12±0.02 | 0.58±0.04 | 6.82±1.64 | 131.01±43.13 | 1241.73±124.9  | 50.54±3.48 | 372.74±46.13 | 29.84±30.18 | 448.53±84.22  | 381.91±29.28 | 198.09±30.32 | 2.3±0.39  | 45.19±17.91 | 421.23±41.44  | 17.19±1.82 |
| No lime | UF-613   | 1.19±0.02 | 0.05±0.02 | 2.55±0.07 | 1.1±0.04  | 0.55±0.01 | 5.04±0.51 | 117.79±10.06 | 1013.96±197.75 | 45.5±4.08  | 369.63±18.5  | 16.7±6.73   | 721.34±98.47  | 341.31±9.33  | 172.29±5.7   | 1.57±0.14 | 36.66±3.1   | 316.31±65.7   | 14.14±0.83 |

|            |             |               |               |               |               |               |               |                  |                    |                 |                  |                |                   |                  |                  |               |                 |                  |                |
|------------|-------------|---------------|---------------|---------------|---------------|---------------|---------------|------------------|--------------------|-----------------|------------------|----------------|-------------------|------------------|------------------|---------------|-----------------|------------------|----------------|
| No<br>lime | UF-667      | 1.07±<br>0.02 | 0.02±<br>0.01 | 1.68±<br>0.15 | 1.13±<br>0.06 | 0.62±<br>0.03 | 7.1±2.0<br>2  | 175.17±4<br>9.31 | 829.31±15<br>3.97  | 37.67±2<br>.53  | 402.51±1<br>0.52 | 6.29±2.<br>31  | 622.99±10<br>9.14 | 424.31±3<br>5.85 | 231.37±1<br>5.18 | 2.65±0.<br>7  | 65.27±1<br>6.58 | 310.59±5<br>4.7  | 14.15±1<br>.38 |
| No<br>lime | UGU-<br>112 | 0.7±0.<br>06  | 0.06±<br>0.01 | 2.23±<br>0.21 | 1.19±<br>0.21 | 0.52±<br>0.06 | 7.46±1.<br>68 | 239.28±4<br>1.27 | 1097.48±2<br>26.79 | 49.14±1<br>0.99 | 189.83±2<br>3.54 | 17.02±2<br>.14 | 630.71±10<br>4    | 321.46±4<br>4.69 | 141.64±1<br>7.05 | 2.04±0.<br>55 | 64.19±4<br>.5   | 296.67±6<br>1.25 | 13.18±2<br>.27 |
| No<br>lime | UGU-<br>126 | 0.62±<br>0.06 | 0.05±<br>0.03 | 1.01±<br>0.27 | 1.5±0.<br>06  | 0.61±<br>0.08 | 5.41±0.<br>21 | 171.81±3<br>1.07 | 829.18±52<br>.97   | 44.48±5<br>.31  | 123.54±2<br>9.12 | 10.4±7.<br>36  | 382.49±13<br>0.1  | 302.76±8<br>9.38 | 124.55±4<br>6.71 | 1.09±0.<br>32 | 34.77±1<br>2.83 | 167.28±5<br>1.29 | 9.12±3.<br>37  |
| No<br>lime | UGU-<br>130 | 0.76±<br>0.05 | 0.05±<br>0.02 | 1.32±<br>0.19 | 1.48±<br>0.16 | 0.54±<br>0.03 | 6.27±1.<br>79 | 202.77±4<br>7    | 1025.67±1<br>57.66 | 55.22±3<br>.13  | 119.48±5<br>6.4  | 7.48±3.<br>61  | 309.5±63.<br>71   | 222.09±6<br>7.45 | 81.92±30.<br>35  | 0.91±0.<br>24 | 30.65±1<br>0.87 | 164.01±8<br>6.32 | 8.41±3.<br>05  |
| No<br>lime | UNG-53      | 1.14±<br>0.09 | 0.05±<br>0.02 | 2.26±<br>0.59 | 1.31±<br>0.11 | 0.84±<br>0.05 | 7±1           | 90±19.92         | 1595±281.<br>57    | 68.33±4<br>.04  | 323.56±3<br>7.79 | 12.95±4<br>.63 | 756.53±24<br>9.03 | 372.14±1<br>3.93 | 237.33±8.<br>48  | 1.98±0.<br>27 | 25.33±3<br>.54  | 452.17±7<br>6.57 | 19.39±0<br>.64 |
| No<br>lime | UNG-73      | 1.08±<br>0.04 | 0.07±<br>0.01 | 1.8±0.<br>05  | 1.29±<br>0.17 | 0.56±<br>0.09 | 9.69±2.<br>21 | 168.4±26<br>.21  | 802.87±39<br>4.72  | 59.23±1<br>0.37 | 234.98±4<br>2.47 | 15.92±3<br>.03 | 591.27±22<br>.92  | 277.55±4<br>7.64 | 119.95±1<br>7.2  | 2.05±0.<br>24 | 36.52±8<br>.04  | 169.97±8<br>1.44 | 12.66±1<br>.73 |
| No<br>lime | UNG-76      | 1.16±<br>0.11 | 0.07±<br>0.01 | 1.52±<br>0.2  | 1.18±<br>0.09 | 0.42±<br>0.04 | 9.63±3.<br>4  | 163.16±1<br>0.82 | 638.57±15<br>9.41  | 45.49±3<br>.96  | 130.61±5<br>1.48 | 8.08±5.<br>3   | 499.45±50<br>.79  | 139.06±7<br>5.58 | 49.61±27.<br>92  | 1.08±0.<br>52 | 19.15±1<br>0.32 | 75.56±43.<br>04  | 5.35±2.<br>93  |
| No<br>lime | UNG-77      | 1.04±<br>0.04 | 0.08±<br>0.02 | 1.85±<br>0.04 | 1.03±<br>0.05 | 0.61±<br>0.04 | 7±3.61        | 166.67±5<br>9.16 | 1516.67±2<br>72.13 | 70.67±3<br>.79  | 300.75±5<br>6.09 | 22.43±2<br>.79 | 635.36±64<br>.67  | 295.43±4<br>2.79 | 175.3±36.<br>15  | 1.92±0.<br>7  | 46.14±8<br>.33  | 427.95±2<br>4.57 | 20.19±2<br>.12 |



**Table S3.** Results of Acid Tolerance Index (ATI), Corrected Acidity Tolerance Index (CATI) and Genotypic Tolerance Index (GTI) in % of 60 cacao clones submitted to soil acidity

| Genotypes   | ATI % | CATI % | GTI %  |
|-------------|-------|--------|--------|
| AYP-15      | 83.99 | 68.37  | 107.97 |
| AYP-20      | 63.45 | 24.83  | 26.74  |
| AYP-22      | 93.13 | 68.95  | 84.17  |
| BN-34       | 98.54 | 80.18  | 112.60 |
| BS-01       | 88.26 | 73.28  | 103.73 |
| CA-14       | 96.85 | 84.22  | 109.98 |
| CCN-10      | 96.77 | 92.84  | 145.25 |
| CCN-51      | 98.66 | 98.66  | 150.66 |
| CEPEC-2002  | 86.70 | 63.69  | 105.49 |
| CP-2005-C10 | 81.96 | 59.45  | 96.92  |
| CP-49-C10   | 96.91 | 78.24  | 121.06 |
| CP-53-C10   | 92.52 | 71.85  | 100.32 |
| EET-400     | 96.10 | 77.72  | 98.64  |
| H-10        | 83.80 | 59.33  | 96.35  |
| ICS-1       | 82.17 | 51.21  | 76.46  |
| ICS-39      | 90.64 | 73.70  | 107.97 |
| ICS-6       | 87.12 | 65.65  | 105.86 |
| ICS-95      | 91.16 | 90.32  | 120.73 |
| ICT-1026    | 91.55 | 78.58  | 121.85 |
| ICT-1087    | 92.45 | 91.38  | 153.32 |
| ICT-1092    | 87.39 | 62.00  | 80.00  |
| ICT-1112    | 91.52 | 71.23  | 102.82 |
| ICT-1189    | 95.81 | 85.02  | 113.99 |
| ICT-1251    | 98.18 | 70.65  | 79.32  |
| ICT-1281    | 99.37 | 74.02  | 87.63  |
| ICT-1292    | 90.53 | 68.20  | 107.47 |
| ICT-1506    | 99.95 | 73.23  | 81.90  |
| ICT-2142    | 89.33 | 70.41  | 113.45 |
| ICT-2161    | 92.99 | 66.46  | 95.84  |
| ICT-2171    | 80.78 | 62.34  | 119.47 |
| ICT-2172    | 83.10 | 67.31  | 113.57 |
| ICT-2173    | 78.52 | 63.83  | 116.94 |
| ICT-2653    | 82.54 | 57.86  | 91.50  |
| IMC-67      | 95.49 | 69.51  | 93.80  |
| IPIRANGA-1  | 76.45 | 60.71  | 131.77 |
| NUC-156     | 86.30 | 52.35  | 54.44  |
| PAS-100     | 88.03 | 59.30  | 62.98  |
| PAS-105     | 87.72 | 60.01  | 88.69  |
| PAS-91      | 99.87 | 91.89  | 127.53 |
| PAS-93      | 99.02 | 84.00  | 102.40 |
| PH-09       | 98.38 | 80.70  | 114.92 |
| PH-144      | 95.57 | 86.99  | 130.61 |
| PH-15       | 93.70 | 75.43  | 118.79 |
| PH-16       | 86.20 | 69.62  | 125.32 |

|          |       |       |        |
|----------|-------|-------|--------|
| PH-17    | 84.77 | 61.48 | 93.71  |
| PH-21    | 97.29 | 92.92 | 130.87 |
| PH-990   | 81.10 | 70.53 | 133.27 |
| POUND-12 | 89.91 | 56.41 | 72.87  |
| SCA-6    | 95.24 | 80.59 | 114.68 |
| TSH-1188 | 99.03 | 73.06 | 93.96  |
| TSH-565  | 99.88 | 88.78 | 133.04 |
| UF-613   | 91.30 | 68.34 | 84.62  |
| UF-667   | 90.00 | 89.07 | 140.40 |
| UGU-112  | 99.52 | 71.37 | 70.49  |
| UGU-126  | 59.17 | 31.33 | 64.35  |
| UGU-130  | 74.07 | 30.23 | 34.58  |
| UNG-53   | 84.64 | 63.56 | 94.25  |
| UNG-73   | 69.31 | 39.72 | 88.80  |
| UNG-76   | 30.41 | 9.23  | 32.66  |
| UNG-77   | 79.60 | 60.34 | 112.92 |

---
